# Supplementary material
Source: PubMed Central journal article supplement (PMC2849738)
Supplement: NIHMS144677-supplement-Supp_Table_s2.pdf [file NIHMS144677-supplement-Supp_Table_s2.pdf]

Table S2: Parameters of the  $U_{rot}$  potentials for the 19 natural amino-acid residues with side chains [eqs. (3 – 7)].

| Parameter <sup>a</sup> | Cys      | Met      | Phe      | Ile      | Leu      | Val      | Trp      | Tyr      | Ala       |
|------------------------|----------|----------|----------|----------|----------|----------|----------|----------|-----------|
| $a_o^{(11)}$           | 2.51605  | 0.24238  | 2.90528  | 2.54701  | 1.68074  | 2.85342  | 2.92162  | 2.84839  | 29.58180  |
| $a_1^{(11)}$           | 1.51929  | -3.86782 | 1.56340  | -0.48056 | 2.20626  | 2.37246  | 0.68492  | 1.22045  | 5.30240   |
| $a_2^{(11)}$           | -0.54971 | -2.51944 | 0.26070  | -0.21517 | -1.02049 | 0.34731  | -0.59915 | 0.16459  | -8.74785  |
| $a_3^{(11)}$           | -1.03116 | -1.84006 | -1.43661 | 0.83732  | -4.44200 | -1.68786 | -1.78615 | -1.41606 | 6.25203   |
| $b_{11}^{(11)}$        | 1.14397  | 0.34635  | 1.03599  | 0.72954  | 1.74090  | 1.16716  | 1.27231  | 0.86491  | 53.43450  |
| $b_{12}^{(11)}$        | -0.75560 | 2.56072  | 1.07811  | 0.38901  | -0.55626 | 1.45065  | -1.44288 | 1.09154  | 0.06659   |
| $b_{13}^{(11)}$        | 2.23496  | -0.45695 | 0.32429  | 0.04543  | 0.35981  | 1.57411  | 0.99100  | 0.34693  | 15.72600  |
| $b_{22}^{(11)}$        | 2.48856  | 0.10413  | 1.02414  | 0.04329  | 1.50504  | 2.01749  | 1.20764  | 0.95936  | 11.09290  |
| $b_{23}^{(11)}$        | 1.28945  | -1.20550 | 1.58252  | -0.84954 | 1.45281  | 0.96613  | 0.17445  | 1.44025  | 68.83980  |
| $b_{33}^{(11)}$        | -1.09211 | -0.23211 | 0.84045  | 1.77407  | -1.44737 | -0.32158 | 0.44667  | 1.02076  | 26.12760  |
| $a_o^{(12)}$           | -2.97612 | 0.37399  | -0.98359 | -1.45127 | -4.57678 | -3.24356 | -1.46551 | -0.95541 | -30.97710 |
| $a_1^{(12)}$           | -2.50713 | 0.80783  | 0.28431  | 1.33736  | -4.97452 | -1.33795 | -0.60316 | 0.35288  | -4.64674  |
| $a_2^{(12)}$           | 1.07203  | 0.70786  | -0.31229 | 0.61389  | 1.65854  | 1.40769  | -0.22843 | -0.37406 | 8.80411   |
| $a_3^{(12)}$           | -0.95678 | -0.99396 | -1.07451 | -1.30001 | 2.95523  | -0.43921 | -0.70119 | -0.93948 | -27.39160 |
| $b_{11}^{(12)}$        | -2.53337 | -1.43290 | -0.65970 | -1.11554 | -3.05383 | -0.48251 | -1.34335 | -0.77477 | -15.91100 |
| $b_{12}^{(12)}$        | 1.51301  | 4.67210  | 0.42843  | 0.05134  | 1.90392  | 1.50076  | 3.35213  | 0.83683  | 8.86996   |
| $b_{13}^{(12)}$        | -0.87081 | -2.67538 | -3.52701 | 0.18282  | 4.28999  | -3.71279 | -3.30484 | -3.08056 | -12.06390 |
| $b_{22}^{(12)}$        | -1.69125 | 2.58128  | -0.82814 | 0.27950  | -0.61735 | -2.71987 | -0.43142 | -0.53621 | -5.66423  |
| $b_{23}^{(12)}$        | 2.24227  | 2.11275  | -0.14242 | 0.10872  | 1.49912  | 0.80043  | 0.89213  | -0.50661 | -1.83919  |
| $b_{33}^{(12)}$        | 1.26610  | -0.79436 | 0.50052  | -0.61536 | -0.81608 | -0.03510 | 0.31278  | 0.35279  | -12.90520 |
| $c_{111}^{(12)}$       | -1.57099 | 0.40142  | -0.77139 | 0.49608  | -2.08039 | -0.59011 | -0.80766 | -0.77676 | -3.40765  |
| $c_{112}^{(12)}$       | 0.65497  | 1.69693  | 0.23025  | -0.15955 | 0.23693  | 0.01793  | 0.37317  | 0.37771  | -8.09089  |
| $c_{113}^{(12)}$       | 1.06364  | -0.72304 | -0.78212 | 0.46186  | 2.23788  | 0.06958  | -0.56830 | -0.47843 | 5.99944   |
| $c_{122}^{(12)}$       | 0.99927  | -1.08367 | -0.22990 | 0.75453  | -0.77260 | -0.75257 | -0.42677 | -0.17175 | 3.45665   |
| $c_{123}^{(12)}$       | -0.77130 | -0.74886 | -0.81246 | 0.00510  | -1.40331 | -0.74686 | -0.87304 | -1.33337 | 3.76587   |
| $c_{133}^{(12)}$       | -1.95198 | 1.49514  | 1.28514  | 0.08683  | -2.20789 | 0.00024  | 0.63318  | 1.30068  | -4.69626  |
| $c_{222}^{(12)}$       | 0.96461  | -1.22510 | -0.09761 | 0.57628  | 0.49668  | 0.50307  | -0.14932 | -0.21144 | 12.81400  |
| $c_{223}^{(12)}$       | -2.49265 | -0.60438 | -0.58735 | -0.51684 | -0.60065 | -1.25613 | -0.55909 | -0.65089 | -23.92370 |
| $c_{233}^{(12)}$       | -0.53516 | 0.23525  | -0.44342 | 0.19720  | 0.92525  | 0.88722  | -0.45376 | -0.53901 | 4.08151   |
| $c_{333}^{(12)}$       | 0.48288  | 0.32317  | 0.28904  | -1.24512 | 1.35444  | 0.74959  | 0.43279  | 0.18420  | -9.46834  |

Table S2 (continued)

| Parameter <sup>a</sup> | Cys      | Met      | Phe      | Ile      | Leu      | Val      | Trp      | Tyr      | Ala       |
|------------------------|----------|----------|----------|----------|----------|----------|----------|----------|-----------|
| $a_0^{(21)}$           | 1.85391  | 2.22233  | 0.76666  | 1.30316  | 2.98901  | 2.34369  | 0.74505  | 0.51572  | 12.85830  |
| $a_1^{(21)}$           | 4.00197  | 3.33934  | 2.29069  | -0.11612 | 4.11687  | 1.16380  | 3.22668  | 1.82590  | 8.45145   |
| $a_2^{(21)}$           | -0.08291 | 4.42027  | -0.13522 | 0.03627  | 0.11266  | -0.91008 | 0.57315  | 0.32891  | -3.33216  |
| $a_3^{(21)}$           | 0.82622  | 0.22970  | -1.64952 | -0.29714 | -0.15936 | -0.26674 | -0.37484 | -1.27062 | 6.67105   |
| $b_{11}^{(21)}$        | 1.63209  | -0.05991 | 0.53475  | 0.13112  | 0.67354  | -0.56330 | 0.58434  | 0.34630  | -15.86380 |
| $b_{12}^{(21)}$        | 1.66771  | 2.34128  | -0.35950 | -0.42590 | 0.06041  | -2.12425 | 0.67411  | -0.22214 | 3.57087   |
| $b_{13}^{(21)}$        | -1.17122 | -0.05072 | -1.82356 | 0.19600  | -3.33410 | 0.94504  | -1.03151 | -1.59346 | 8.87391   |
| $b_{22}^{(21)}$        | 0.59394  | 2.54336  | 0.16334  | 1.05762  | 0.58645  | 1.76547  | 0.37478  | 0.32713  | 1.45649   |
| $b_{23}^{(21)}$        | -1.59910 | -0.04292 | -1.49499 | 0.18953  | -2.00441 | -3.05306 | -0.39062 | -1.40575 | -17.55400 |
| $b_{33}^{(21)}$        | -0.36420 | -0.29365 | 0.06328  | 0.11423  | 1.86576  | 1.15000  | -0.20799 | -0.16174 | -0.41096  |
| $a_0^{(22)}$           | -2.29314 | -0.53638 | -0.80558 | -1.07133 | 0.90740  | -1.30236 | -0.98651 | -0.96498 | -3.64673  |
| $a_1^{(22)}$           | -2.33545 | 1.07886  | 0.38410  | 1.01727  | 2.73626  | -0.13382 | 0.62130  | 0.29009  | -6.89021  |
| $a_2^{(22)}$           | -0.85889 | -2.00329 | -0.63636 | -0.71490 | -0.04225 | -0.07089 | -1.48210 | -0.84620 | -3.78829  |
| $a_3^{(22)}$           | -0.11627 | -0.71328 | -0.32117 | -0.95675 | -2.76198 | -1.01247 | -0.08079 | -0.29735 | -15.39710 |
| $b_{11}^{(22)}$        | -1.42793 | 0.49897  | 0.53480  | -0.56566 | 2.25406  | -0.25572 | 1.28514  | 0.40053  | -7.14512  |
| $b_{12}^{(22)}$        | -1.44750 | -3.53547 | -0.80036 | 0.10767  | -0.36860 | 0.26602  | -0.97289 | -0.61502 | -11.87840 |
| $b_{13}^{(22)}$        | -0.41698 | -1.84322 | -2.04254 | 0.41614  | -6.67784 | -2.40662 | -2.51630 | -1.62189 | -4.67815  |
| $b_{22}^{(22)}$        | -1.83497 | -2.26615 | -1.27849 | -0.09355 | -2.65542 | -1.58579 | -1.99115 | -1.36734 | 7.97568   |
| $b_{23}^{(22)}$        | 0.12752  | 1.42433  | -0.24445 | -0.57723 | 0.29198  | 1.52721  | 0.72171  | -0.52979 | -9.34330  |
| $b_{33}^{(22)}$        | 0.97526  | 1.21319  | -0.06493 | -0.41220 | 1.39461  | 0.54573  | -0.27678 | -0.00013 | -4.48287  |
| $c_{111}^{(22)}$       | -0.66321 | -0.12624 | -0.00275 | 0.15054  | 0.69796  | -0.05921 | 0.47016  | -0.06604 | -2.33245  |
| $c_{112}^{(22)}$       | -0.06051 | -0.49249 | -0.47087 | 0.58543  | -0.21442 | 0.25242  | -1.38931 | -0.38697 | -3.22406  |
| $c_{113}^{(22)}$       | 0.18036  | -0.68689 | -0.69215 | 0.39512  | -3.29798 | 1.11247  | -1.26028 | -0.33307 | 8.45463   |
| $c_{122}^{(22)}$       | -1.10955 | 0.54346  | -0.10285 | 0.36485  | -0.68506 | -0.29992 | 0.33546  | 0.01666  | 4.18947   |
| $c_{123}^{(22)}$       | -1.49843 | 1.44878  | -0.39010 | 0.44526  | -0.64285 | -0.75652 | -0.21826 | -0.89689 | -12.60820 |
| $c_{133}^{(22)}$       | -0.57131 | 0.66636  | 0.49036  | 0.50192  | 2.65406  | 0.22056  | -0.18350 | 0.33950  | -8.74235  |
| $c_{222}^{(22)}$       | -1.10140 | -0.88704 | -0.44502 | -1.24249 | -0.30655 | 0.07843  | -0.42059 | -0.79789 | 0.68796   |
| $c_{223}^{(22)}$       | -0.45620 | 0.23718  | -0.11008 | -0.65370 | 0.58505  | -1.66867 | 0.72953  | -0.42948 | -19.72450 |
| $c_{233}^{(22)}$       | 0.31459  | -0.61965 | 0.28001  | -0.05777 | 0.47625  | -0.40138 | 0.32703  | 0.33894  | -1.24989  |
| $c_{333}^{(22)}$       | 0.16230  | -0.27415 | 0.47784  | -0.69824 | 0.00251  | -0.45302 | 0.45498  | 0.46230  | -4.13017  |
| $\delta_{SC}$          | -0.19556 | -0.00162 | -0.41176 | -0.36268 | -0.22455 | -0.41107 | -0.36494 | -0.39024 | 0.64333   |
| $\delta_{p/2}$         | -1.68224 | -1.65596 | -1.54820 | -1.51860 | -1.77870 | -1.56962 | -1.52335 | -1.52480 | -1.81715  |
| $\mu_1$                | 0.76713  | 5.11995  | 2.44359  | 2.52545  | 1.64352  | 1.49311  | 2.59134  | 2.79377  | -2.05943  |
| $\epsilon_1$           | 6.28606  | 3.85081  | 3.91767  | 0.37440  | 8.32135  | 5.92220  | 3.99292  | 3.08775  | 10.86680  |
| $\mu_2$                | 4.99908  | 6.77231  | 3.42588  | 0.68294  | 8.66213  | 4.60954  | 3.50082  | 2.54354  | 1.83275   |
| $\epsilon_2$           | 4.99908  | 6.77231  | 3.42588  | 0.68294  | 8.66213  | 4.60954  | 3.50082  | 2.54354  | 1.83275   |

Table S2 (continued)

| Parameter <sup>a</sup> | Thr      | Ser      | Glu      | Asn      | Glu      | Asp      | His      | Arg       | Lys      | Pro      |
|------------------------|----------|----------|----------|----------|----------|----------|----------|-----------|----------|----------|
| $a_o^{(11)}$           | 2.55287  | 3.26126  | 0.07053  | 2.88716  | 0.07053  | 3.39310  | 2.77184  | 15.63500  | 3.62920  | 4.18167  |
| $a_1^{(11)}$           | 0.90868  | 2.37232  | 0.91388  | 1.50551  | 0.91388  | 1.53049  | 1.87142  | 15.48010  | 8.35476  | 0.81843  |
| $a_2^{(11)}$           | 0.01369  | -0.44189 | 0.97020  | -0.88066 | 0.97020  | -0.05620 | 0.64267  | 6.64887   | -5.31665 | 1.55799  |
| $a_3^{(11)}$           | -1.91202 | -7.14453 | -1.41886 | -1.80205 | -1.41886 | -1.82937 | -1.62198 | -18.86740 | -6.44225 | -2.59002 |
| $b_{11}^{(11)}$        | 0.37403  | 1.44098  | 1.51923  | 1.31805  | 1.51923  | 0.14130  | 1.04056  | 8.11272   | 3.02912  | 3.17138  |
| $b_{12}^{(11)}$        | -0.00240 | -0.94414 | 3.40886  | 0.40659  | 3.40886  | 1.94797  | 1.25505  | 0.56312   | -1.23219 | -3.04270 |
| $b_{13}^{(11)}$        | 1.31457  | -0.88391 | -1.14177 | -0.45076 | -1.14177 | -2.25684 | 0.15679  | -5.93336  | -4.59845 | 2.33064  |
| $b_{22}^{(11)}$        | 2.53485  | 0.89289  | 2.36347  | 0.85385  | 2.36347  | 0.77178  | 0.85806  | 1.09187   | -0.25350 | 2.03620  |
| $b_{23}^{(11)}$        | -0.33966 | 3.26712  | -1.99853 | 1.91844  | -1.99853 | 2.41802  | 2.11391  | -1.13515  | -0.18886 | 3.50246  |
| $b_{33}^{(11)}$        | -0.35824 | 0.96724  | 1.08195  | 0.72865  | 1.08195  | 2.51779  | 0.86464  | 6.42884   | 1.09574  | -0.97218 |
| $a_o^{(12)}$           | -2.46803 | -4.50080 | -5.89011 | -1.49598 | -5.89011 | -2.16585 | -0.94982 | -11.55860 | -4.35997 | -2.66321 |
| $a_1^{(12)}$           | -0.62824 | -4.68083 | -3.46734 | -1.30591 | -3.46734 | -2.02103 | 0.20262  | -9.16484  | -5.66128 | 0.06148  |
| $a_2^{(12)}$           | 1.98221  | 1.27161  | 3.12824  | -0.00677 | 3.12824  | 0.46515  | -0.10823 | 0.61553   | 2.92707  | 0.33887  |
| $a_3^{(12)}$           | 0.35334  | 4.06269  | 1.89145  | -1.01811 | 1.89145  | 0.84916  | -1.11941 | 6.20954   | 3.79064  | -1.11172 |
| $b_{11}^{(12)}$        | -0.37257 | -2.10063 | -0.75110 | -1.19671 | -0.75110 | -1.40864 | -0.29454 | -4.68229  | -4.59566 | 0.40780  |
| $b_{12}^{(12)}$        | 4.08459  | 2.31885  | 3.94559  | 1.71815  | 3.94559  | 0.95065  | 0.55860  | 1.52429   | 2.53264  | 4.21901  |
| $b_{13}^{(12)}$        | -2.59886 | 5.04789  | 0.94398  | -2.75109 | 0.94398  | 0.20363  | -3.53876 | 4.97614   | 4.92293  | -1.23265 |
| $b_{22}^{(12)}$        | -1.19146 | -0.62060 | -2.94859 | -0.15280 | -2.94859 | -0.39684 | -1.02980 | -5.90920  | 2.10474  | -2.28572 |
| $b_{23}^{(12)}$        | 0.79401  | 0.77214  | -0.88537 | 0.78440  | -0.88537 | -1.75878 | 0.03928  | 3.75096   | 0.44858  | 0.59509  |
| $b_{33}^{(12)}$        | -0.90882 | -1.75134 | 1.29956  | -0.13532 | 1.29956  | -0.33277 | 0.36798  | -0.91317  | -1.68990 | -0.74839 |
| $c_{111}^{(12)}$       | -0.44769 | -1.67604 | -1.28646 | -0.58219 | -1.28646 | -1.00296 | -0.56938 | -2.57727  | -2.29753 | 3.79494  |
| $c_{112}^{(12)}$       | 0.70640  | 0.48164  | 2.27490  | 0.32072  | 2.27490  | 0.66581  | 0.28859  | 0.11315   | 1.92750  | 2.04775  |
| $c_{113}^{(12)}$       | 0.57096  | 1.90555  | 1.06656  | -0.91559 | 1.06656  | -0.03615 | -1.03814 | 0.84095   | 1.40007  | -2.32625 |
| $c_{122}^{(12)}$       | -0.35977 | -1.05550 | -4.81025 | -0.71562 | -4.81025 | -0.82336 | -0.43962 | -5.17365  | -1.44721 | -1.78620 |
| $c_{123}^{(12)}$       | -0.39156 | -0.88415 | -0.13345 | 0.14400  | -0.13345 | 0.18751  | -0.82740 | 0.25605   | -1.51484 | -0.41458 |
| $c_{133}^{(12)}$       | 0.18149  | -1.97281 | -0.81524 | -0.01391 | -0.81524 | -0.21213 | 1.21229  | -1.25096  | -1.96904 | -1.95941 |
| $c_{222}^{(12)}$       | -0.55837 | 0.54882  | 1.37992  | -0.09276 | 1.37992  | 0.17417  | -0.03773 | 1.53839   | 0.33237  | -1.49282 |
| $c_{223}^{(12)}$       | -0.90860 | 0.34776  | 2.48768  | -0.78605 | 2.48768  | 0.31436  | -0.66097 | 3.72847   | 0.98455  | 0.26237  |
| $c_{233}^{(12)}$       | 1.82731  | 0.26330  | 0.82556  | -0.23028 | 0.82556  | -0.37133 | -0.35719 | -1.05335  | 0.61891  | -0.22548 |
| $c_{333}^{(12)}$       | 0.68690  | 1.82858  | 0.83578  | 0.68966  | 0.83578  | 0.58700  | 0.57198  | 1.62187   | 1.57661  | 0.98520  |

Table S2 (continued)

| Parameter <sup>a</sup> | Thr      | Ser      | Glu      | Asn      | Glu      | Asp      | His      | Arg       | Lys      | Pro      |
|------------------------|----------|----------|----------|----------|----------|----------|----------|-----------|----------|----------|
| $a_o^{(21)}$           | 1.18283  | 2.45418  | 2.03556  | 1.06731  | 2.03556  | 0.64177  | 0.96761  | -3.09179  | 3.90223  | 3.10880  |
| $a_1^{(21)}$           | 0.57114  | 5.86142  | 2.80228  | 3.57589  | 2.80228  | 3.38578  | 2.53596  | 0.25389   | 1.63827  | 0.72726  |
| $a_2^{(21)}$           | -2.28123 | -1.77056 | 1.98615  | 0.26015  | 1.98615  | -1.08596 | -0.25597 | -13.73370 | 5.39342  | 1.38087  |
| $a_3^{(21)}$           | -0.36287 | 0.28207  | -1.29632 | -0.52327 | -1.29632 | -1.75134 | -1.68776 | 7.57893   | -0.49815 | 0.38206  |
| $b_{11}^{(21)}$        | -0.51317 | 1.15369  | 1.86006  | 1.16675  | 1.86006  | 1.66685  | 0.74041  | 0.67034   | 1.25533  | 1.95345  |
| $b_{12}^{(21)}$        | -3.80774 | -1.03712 | 0.03090  | -0.84489 | 0.03090  | -1.95688 | -0.57688 | -5.31761  | -1.55655 | -2.86474 |
| $b_{13}^{(21)}$        | 0.83421  | -5.38116 | -0.04977 | -0.88700 | -0.04977 | -0.95367 | -2.17105 | -3.28938  | -2.35832 | 0.67255  |
| $b_{22}^{(21)}$        | -0.30925 | 0.32411  | 2.80632  | 0.11518  | 2.80632  | 0.08257  | 0.09704  | -1.72308  | 3.18032  | 0.24888  |
| $b_{23}^{(21)}$        | -1.65137 | -3.28773 | -0.31975 | -1.51085 | -0.31975 | -0.13096 | -2.28168 | 6.42583   | 0.51629  | -4.20944 |
| $b_{33}^{(21)}$        | 2.00847  | 1.00011  | 0.93087  | -0.20298 | 0.93087  | -1.06729 | 0.12051  | -1.99999  | -0.26797 | 0.96227  |
| $a_o^{(22)}$           | -1.07983 | -0.71722 | -1.84705 | -0.09531 | -1.84705 | 0.27987  | -0.63784 | -4.81969  | -3.39112 | -2.54078 |
| $a_1^{(22)}$           | -0.14879 | 0.05863  | 0.64224  | 0.06653  | 0.64224  | 1.09148  | -0.02765 | -4.63146  | -2.58127 | 0.60753  |
| $a_2^{(22)}$           | -0.23855 | 1.74885  | -1.74023 | 0.32779  | -1.74023 | 0.59705  | -0.51097 | 0.26779   | -2.37086 | -2.70560 |
| $a_3^{(22)}$           | 0.16830  | -0.54907 | -1.12783 | -1.94687 | -1.12783 | -1.80929 | -0.72192 | 3.15499   | 2.16189  | -0.47233 |
| $b_{11}^{(22)}$        | 0.44911  | 0.23395  | 1.30221  | -0.96199 | 1.30221  | 0.56147  | -0.31507 | -2.48197  | -1.26464 | -0.26071 |
| $b_{12}^{(22)}$        | 0.49441  | 2.58216  | -1.16250 | 1.06916  | -1.16250 | 0.66385  | -0.42922 | -3.99992  | -2.24975 | 0.97797  |
| $b_{13}^{(22)}$        | -0.54404 | -2.78644 | -2.46571 | -3.38919 | -2.46571 | -4.02824 | -2.23032 | 3.12405   | 1.93211  | -2.37238 |
| $b_{22}^{(22)}$        | -1.44560 | -1.67587 | -2.24561 | -1.13909 | -2.24561 | -1.58277 | -1.22222 | -0.00579  | -1.93422 | -1.01987 |
| $b_{23}^{(22)}$        | 2.77195  | -1.61105 | 0.82103  | -0.48021 | 0.82103  | -1.13178 | 0.03856  | -1.86804  | 2.81856  | 1.60970  |
| $b_{33}^{(22)}$        | -0.07806 | 0.74367  | 2.24622  | 2.01119  | 2.24622  | 1.32756  | 0.89348  | -2.41691  | -0.01696 | -1.22064 |
| $c_{111}^{(22)}$       | 0.66255  | -0.41824 | -0.61816 | -0.90092 | -0.61816 | -0.09999 | -0.66707 | 0.11227   | -1.07566 | -0.77697 |
| $c_{112}^{(22)}$       | -0.64122 | 0.65321  | 0.39804  | 0.14621  | 0.39804  | 0.29905  | -0.38466 | -2.24747  | -2.52235 | -2.49677 |
| $c_{113}^{(22)}$       | 1.14290  | -1.61491 | -0.88037 | -0.93095 | -0.88037 | -1.89548 | -0.80518 | 0.41547   | -0.16033 | -1.36443 |
| $c_{122}^{(22)}$       | -0.50283 | -1.12235 | -2.03925 | -0.77292 | -2.03925 | -0.92772 | -0.58424 | -3.66036  | -0.72945 | 3.47331  |
| $c_{123}^{(22)}$       | 0.46713  | -2.09200 | -1.65231 | -0.93245 | -1.65231 | 0.02649  | -0.56838 | 3.54113   | 3.31827  | -0.82091 |
| $c_{133}^{(22)}$       | -0.30993 | 1.58161  | 0.04404  | 1.73650  | 0.04404  | 2.10156  | 1.22564  | -0.91846  | -0.85573 | -2.09985 |
| $c_{222}^{(22)}$       | 0.58124  | 0.21464  | -1.40075 | 0.02157  | -1.40075 | 0.15569  | -0.32201 | 1.34760   | 0.43378  | 0.53099  |
| $c_{223}^{(22)}$       | -0.25375 | 0.77935  | 1.38994  | -0.25950 | 1.38994  | 0.43133  | 0.10432  | 0.89250   | 1.57209  | -0.20975 |
| $c_{233}^{(22)}$       | -0.18210 | 0.90712  | -0.50057 | 0.16249  | -0.50057 | 0.14443  | 0.19677  | 1.15695   | -0.30160 | -0.74945 |
| $c_{333}^{(22)}$       | -0.71635 | 0.29981  | 0.04551  | -0.75426 | 0.04551  | -0.32917 | -0.02633 | 1.78041   | 0.86334  | 1.13745  |
| $\delta_{SC}$          | -0.43556 | -0.31913 | -0.44702 | -0.43141 | -0.44702 | -0.46898 | -0.40446 | 0.20926   | -0.58555 | -0.32748 |
| $\delta_{p/2}$         | -1.53686 | -1.76088 | -1.22419 | -1.57343 | -1.22419 | -1.61967 | -1.58591 | 0.05262   | -1.11281 | -1.71415 |
| $\mu_1$                | 0.65792  | 3.27728  | 9.87103  | 1.70268  | 9.87103  | 0.67495  | 2.50496  | 16.45130  | 6.15379  | 2.05306  |
| $\epsilon_1$           | 5.46858  | 10.25320 | 1.15581  | 4.38423  | 1.15581  | 5.38965  | 4.24201  | 29.57570  | 15.33200 | 6.34873  |
| $\mu_2$                | 4.34855  | 8.11291  | 5.54108  | 5.55750  | 5.54108  | 6.09192  | 4.34401  | 16.78170  | 10.15870 | 5.23230  |
| $\epsilon_2$           | 4.34855  | 8.11291  | 5.54108  | 5.55750  | 5.54108  | 6.09192  | 4.34401  | 16.78170  | 10.15870 | 5.23230  |

<sup>a</sup> $a_o^{(11)}$  –  $c_{333}^{(22)}$  are expressed in kcal/mol,  $\delta_{SC}$  and  $\delta_{p/2}$  in Å,  $\mu_1$  and  $\mu_2$  in kcal/(mol×Å), and  $\epsilon_1$  and  $\epsilon_2$  in kcal/(mol×Å<sup>6</sup>).
