# Supplementary material
Source: PubMed Central journal article supplement (PMC2849738)
Supplement: NIHMS144677-supplement-Supp_Table_s3.pdf [file NIHMS144677-supplement-Supp_Table_s3.pdf]

Table S3: Fourier coefficients (kcal/mol) of approximate RFE expressions pertaining to the correlation between local and electrostatic interactions  $U_{corr}^{(m)}$  and  $U_{turn}^{(m)}$  of eq. (1) in U. Kozłowska, G.G. Maisuradze, A. Liwo, H.A. Scheraga, J. Comput. Chem., accompanying paper [see eqs. (43), (46), (48)–(50), and (56)–(58) in A. Liwo, C. Czaplewski, J. Pillardy, H.A. Scheraga, J. Chem. Phys., 2001, 115, 2323-2347 for the meaning of the coefficients] obtained in this work by hierarchical optimization using the 1ENH and 1E0L proteins.

| Coefficient | Gly       | Ala       | Pro       |
|-------------|-----------|-----------|-----------|
| $b_{11}$    | 0.707184  | -0.305115 | 0.686699  |
| $b_{12}$    | 0.000000  | 1.568744  | 0.617979  |
| $b_{21}$    | 1.652732  | -0.083133 | 0.093891  |
| $b_{22}$    | 0.000000  | -1.637985 | -1.359900 |
| $c_{11}$    | -0.927963 | 2.302366  | 1.914370  |
| $c_{12}$    | 0.000000  | -1.596422 | -0.454839 |
| $d_{11}$    | 2.373462  | -2.089734 | -1.548870 |
| $d_{12}$    | 0.000000  | -0.532502 | 0.664143  |
| $e_{11}$    | -0.573715 | 1.296793  | 0.850642  |
| $e_{12}$    | 0.000000  | -0.340513 | -0.879867 |
| $e_{21}$    | 0.000000  | 0.011028  | -0.656144 |
| $e_{22}$    | -1.983253 | -0.587866 | -1.361770 |
