# Supplementary material
Source: PubMed Central journal article supplement (PMC2849738)
Supplement: NIHMS144677-supplement-Supp_Table_s4.pdf [file NIHMS144677-supplement-Supp_Table_s4.pdf]

Table S4: Values of  $\epsilon_{ij}^0$  (kcal/mol) of the Gay-Berne potential (J.G.Gay, B.J. Berne, J. Chem. Phys., 1981, 74, 3316-3319) determined in this work by hierarchical optimization using the 1ENH and 1E0L proteins.

|     | Cys  | Met  | Phe  | Ile  | Leu  | Val  | Trp  | Tyr  | Ala  | Gly  | Thr  | Ser  | Gln   | Asn   | Glu   | Asp   | His  | Arg   | Lys   | Pro  |
|-----|------|------|------|------|------|------|------|------|------|------|------|------|-------|-------|-------|-------|------|-------|-------|------|
| Cys | 1.40 | 1.56 | 1.55 | 1.61 | 1.55 | 1.49 | 1.36 | 1.22 | 1.32 | 1.37 | 1.07 | 1.09 | 1.07  | 0.92  | 0.89  | 0.93  | 1.18 | 0.85  | 0.95  | 1.13 |
| Met |      | 1.66 | 1.67 | 1.70 | 1.71 | 1.59 | 1.54 | 1.38 | 1.37 | 1.23 | 1.07 | 1.01 | 1.05  | 0.88  | 0.86  | 0.70  | 1.20 | 0.97  | 0.90  | 1.16 |
| Phe |      |      | 1.41 | 1.77 | 1.48 | 1.63 | 1.52 | 1.13 | 1.07 | 1.05 | 0.78 | 0.74 | 0.73  | 0.74  | 0.52  | 0.75  | 1.20 | 0.72  | 0.83  | 0.95 |
| Ile |      |      |      | 1.67 | 1.57 | 1.76 | 1.58 | 1.20 | 1.24 | 1.36 | 0.93 | 0.87 | 1.06  | 0.97  | 0.76  | 0.91  | 1.15 | 0.87  | 1.03  | 1.47 |
| Leu |      |      |      |      | 1.61 | 1.86 | 1.57 | 1.65 | 1.26 | 1.47 | 0.80 | 1.31 | 0.84  | 1.14  | 0.63  | 0.65  | 1.13 | 0.76  | 0.75  | 1.15 |
| Val |      |      |      |      |      | 1.63 | 1.61 | 1.37 | 1.43 | 1.26 | 0.80 | 1.26 | 0.95  | 1.10  | 0.62  | 0.69  | 1.01 | 0.91  | 1.01  | 1.10 |
| Trp |      |      |      |      |      |      | 1.07 | 1.46 | 1.35 | 1.33 | 0.64 | 1.14 | 1.23  | 1.19  | 0.74  | 0.85  | 1.16 | 0.81  | 1.18  | 1.13 |
| Tyr |      |      |      |      |      |      |      | 1.23 | 1.10 | 0.75 | 0.94 | 0.99 | 1.01  | 0.45  | 0.92  | 0.47  | 0.97 | 0.61  | 0.66  | 1.27 |
| Ala |      |      |      |      |      |      |      |      | 0.91 | 0.80 | 0.51 | 0.60 | 0.37  | 0.79  | 0.24  | 0.37  | 0.78 | 0.26  | 0.52  | 1.16 |
| Gly |      |      |      |      |      |      |      |      |      | 0.62 | 0.47 | 0.66 | 0.34  | 0.37  | -0.31 | 0.11  | 0.72 | 0.19  | -0.08 | 0.98 |
| Thr |      |      |      |      |      |      |      |      |      |      | 0.50 | 0.31 | 0.14  | 0.35  | 0.13  | 0.50  | 0.71 | 0.28  | -0.12 | 0.99 |
| Ser |      |      |      |      |      |      |      |      |      |      |      | 0.18 | 0.33  | 0.44  | -0.13 | 0.09  | 0.61 | 0.12  | 0.09  | 0.61 |
| Gln |      |      |      |      |      |      |      |      |      |      |      |      | -0.42 | -0.00 | -0.38 | -0.10 | 0.42 | 0.18  | -0.24 | 0.81 |
| Asn |      |      |      |      |      |      |      |      |      |      |      |      |       | 0.06  | -0.00 | 0.04  | 0.53 | 0.10  | -0.18 | 0.56 |
| Glu |      |      |      |      |      |      |      |      |      |      |      |      |       |       | -1.10 | -0.44 | 0.46 | 0.45  | 0.74  | 0.20 |
| Asp |      |      |      |      |      |      |      |      |      |      |      |      |       |       |       | -0.34 | 0.64 | 0.70  | 0.18  | 0.47 |
| His |      |      |      |      |      |      |      |      |      |      |      |      |       |       |       |       | 0.93 | 0.57  | -0.01 | 0.78 |
| Arg |      |      |      |      |      |      |      |      |      |      |      |      |       |       |       |       |      | -0.27 | -0.61 | 0.55 |
| Lys |      |      |      |      |      |      |      |      |      |      |      |      |       |       |       |       |      |       | -0.86 | 0.84 |
| Pro |      |      |      |      |      |      |      |      |      |      |      |      |       |       |       |       |      |       |       | 1.05 |
