# Supplementary material
Source: PubMed Central journal article supplement (PMC2849738)

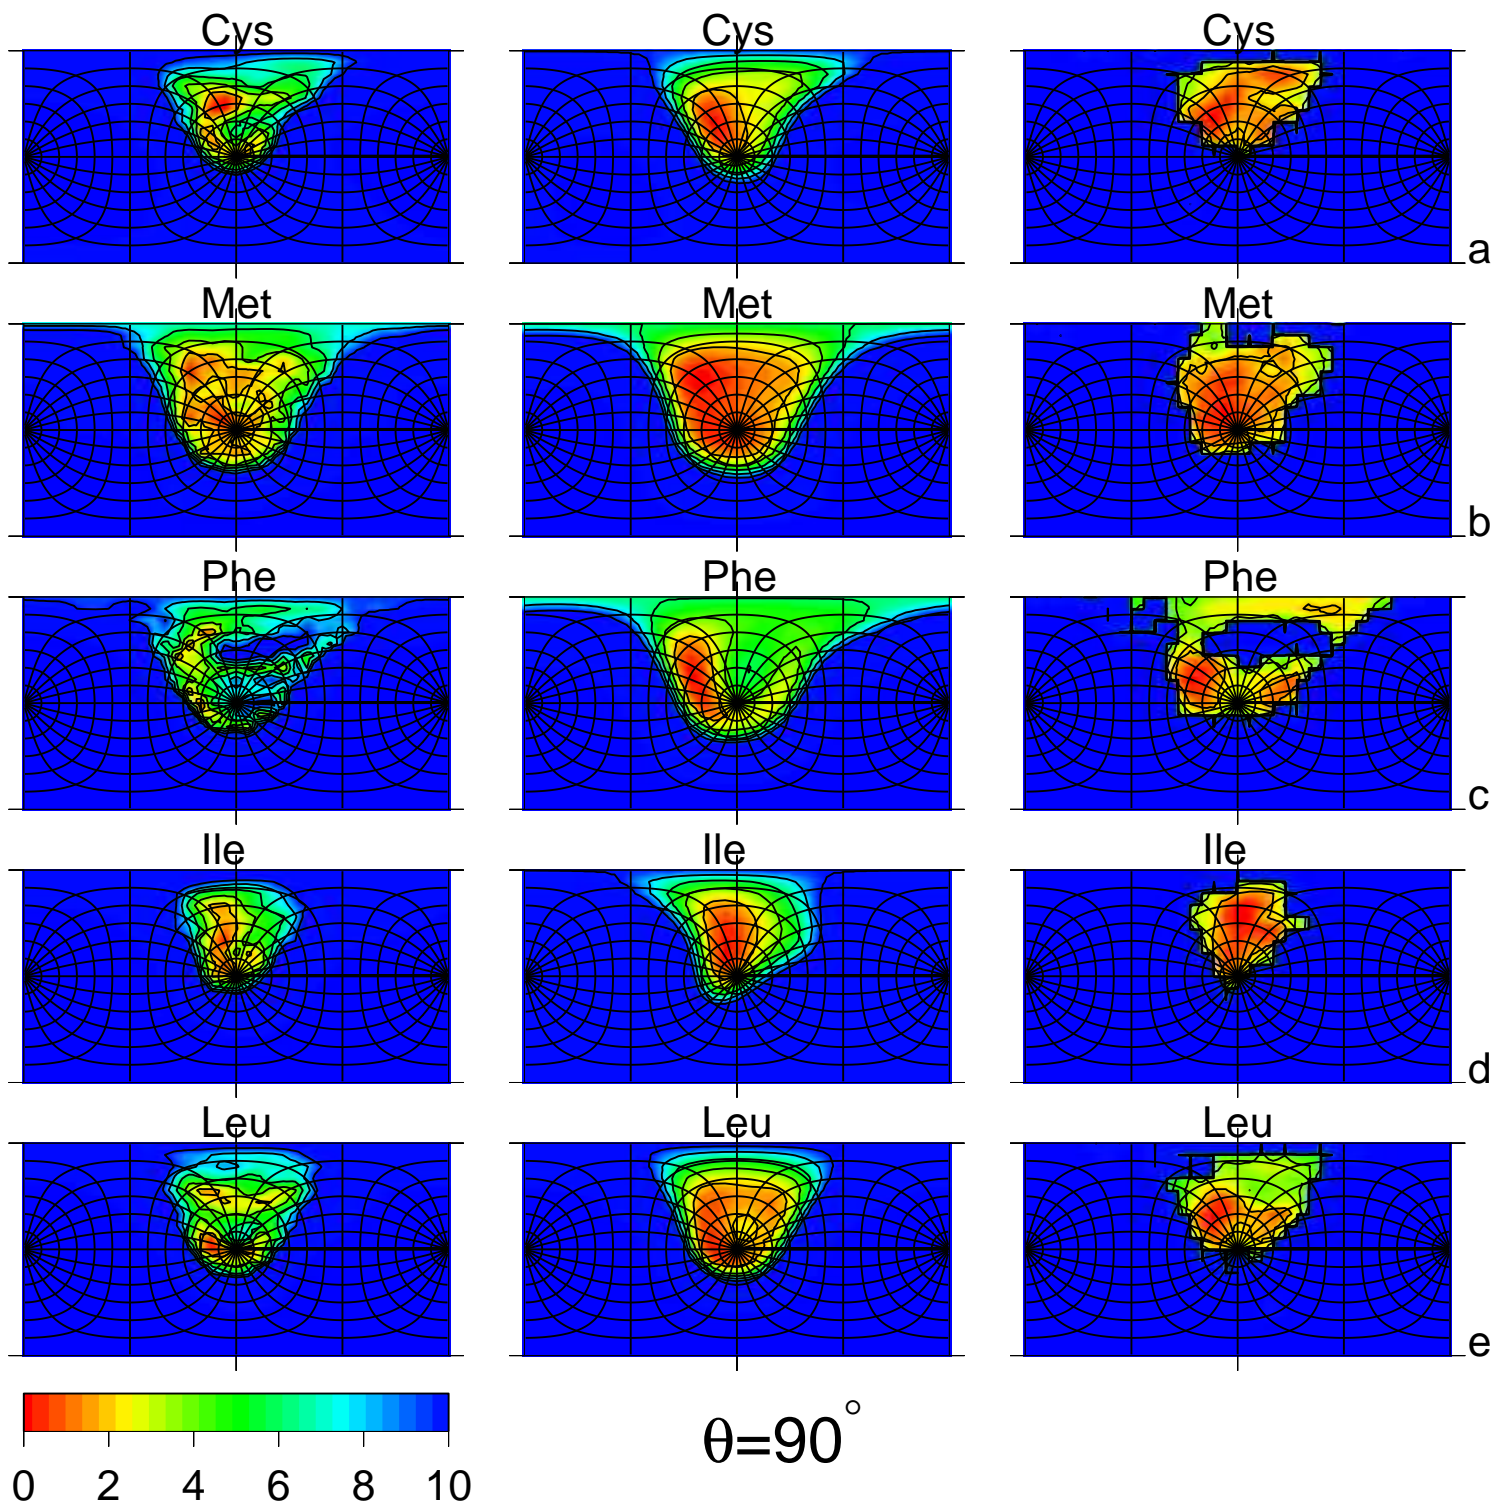

Figure S1

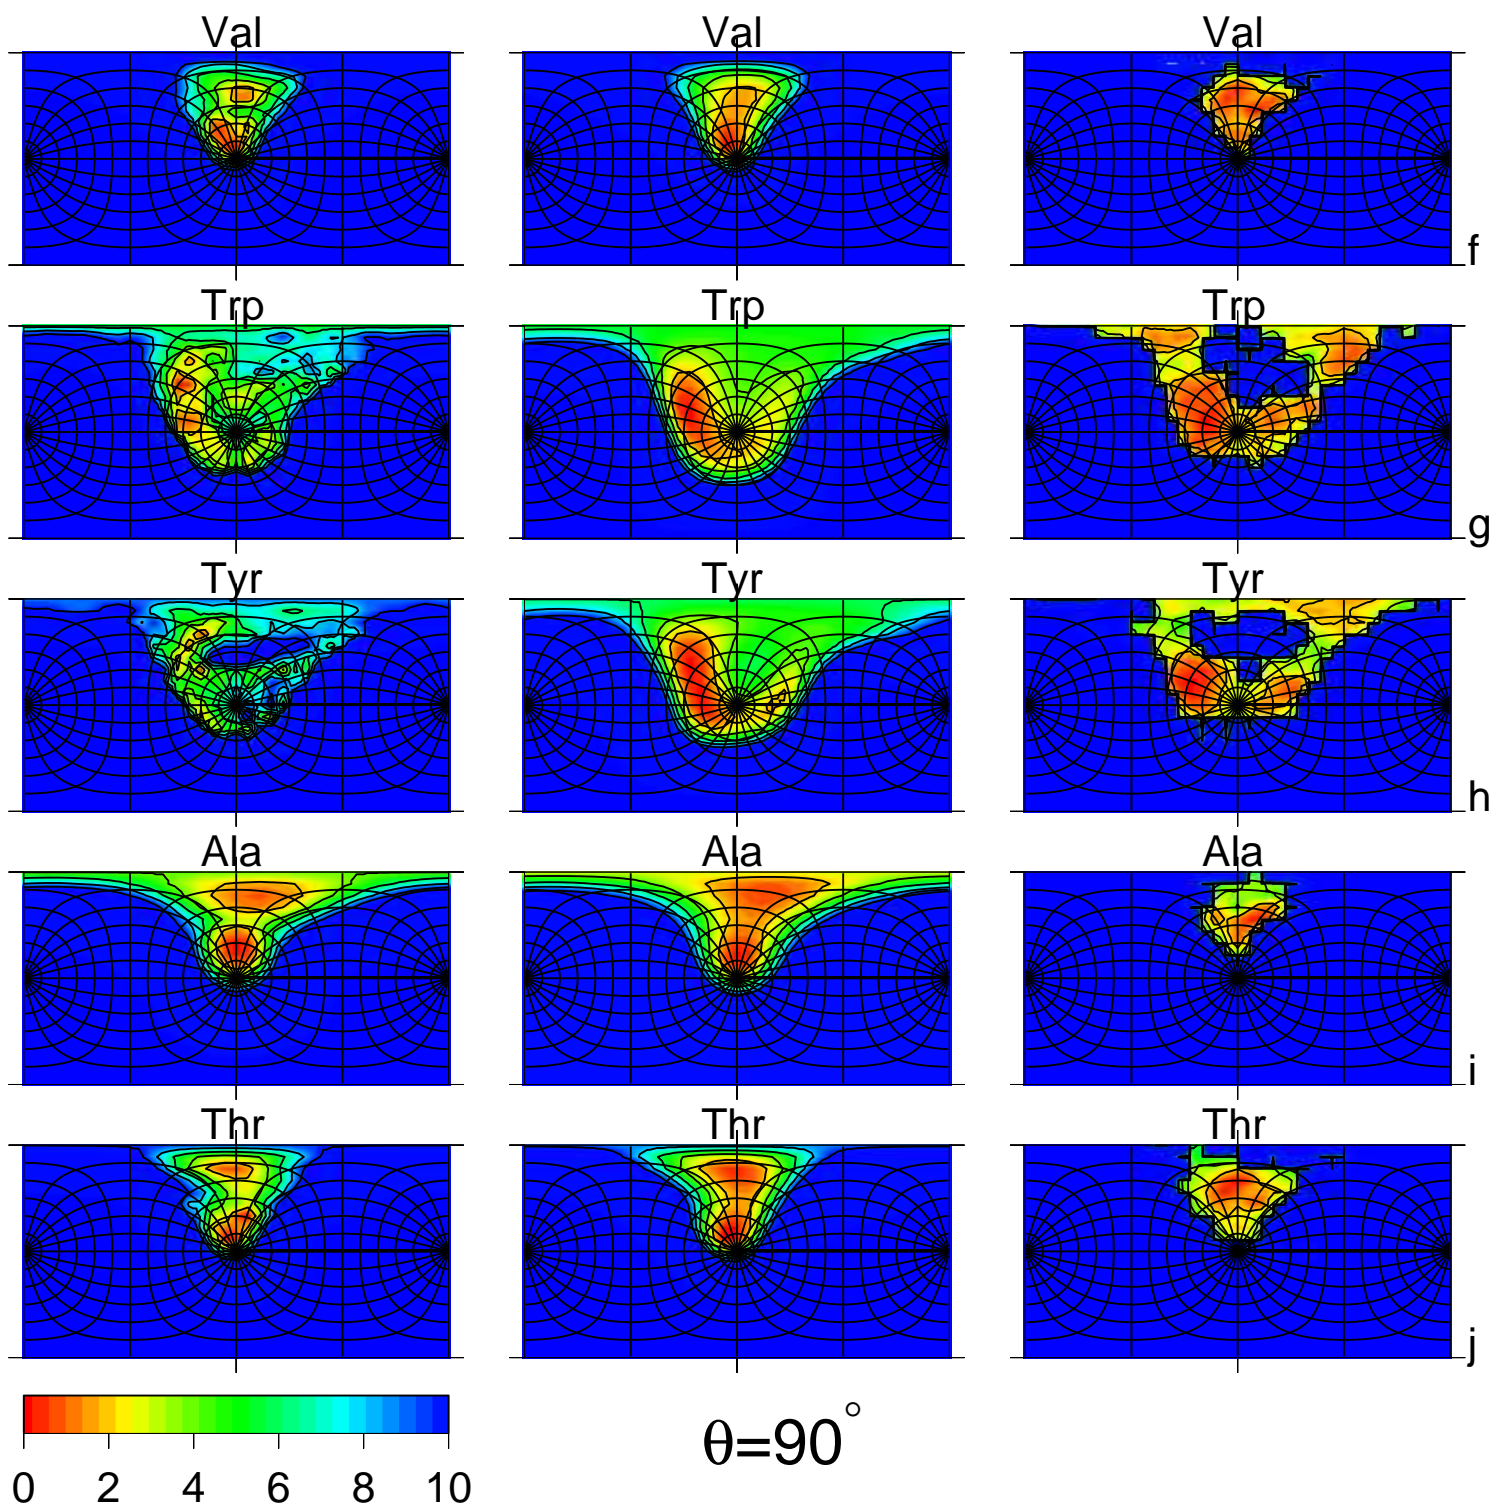

Figure S1 (continued)

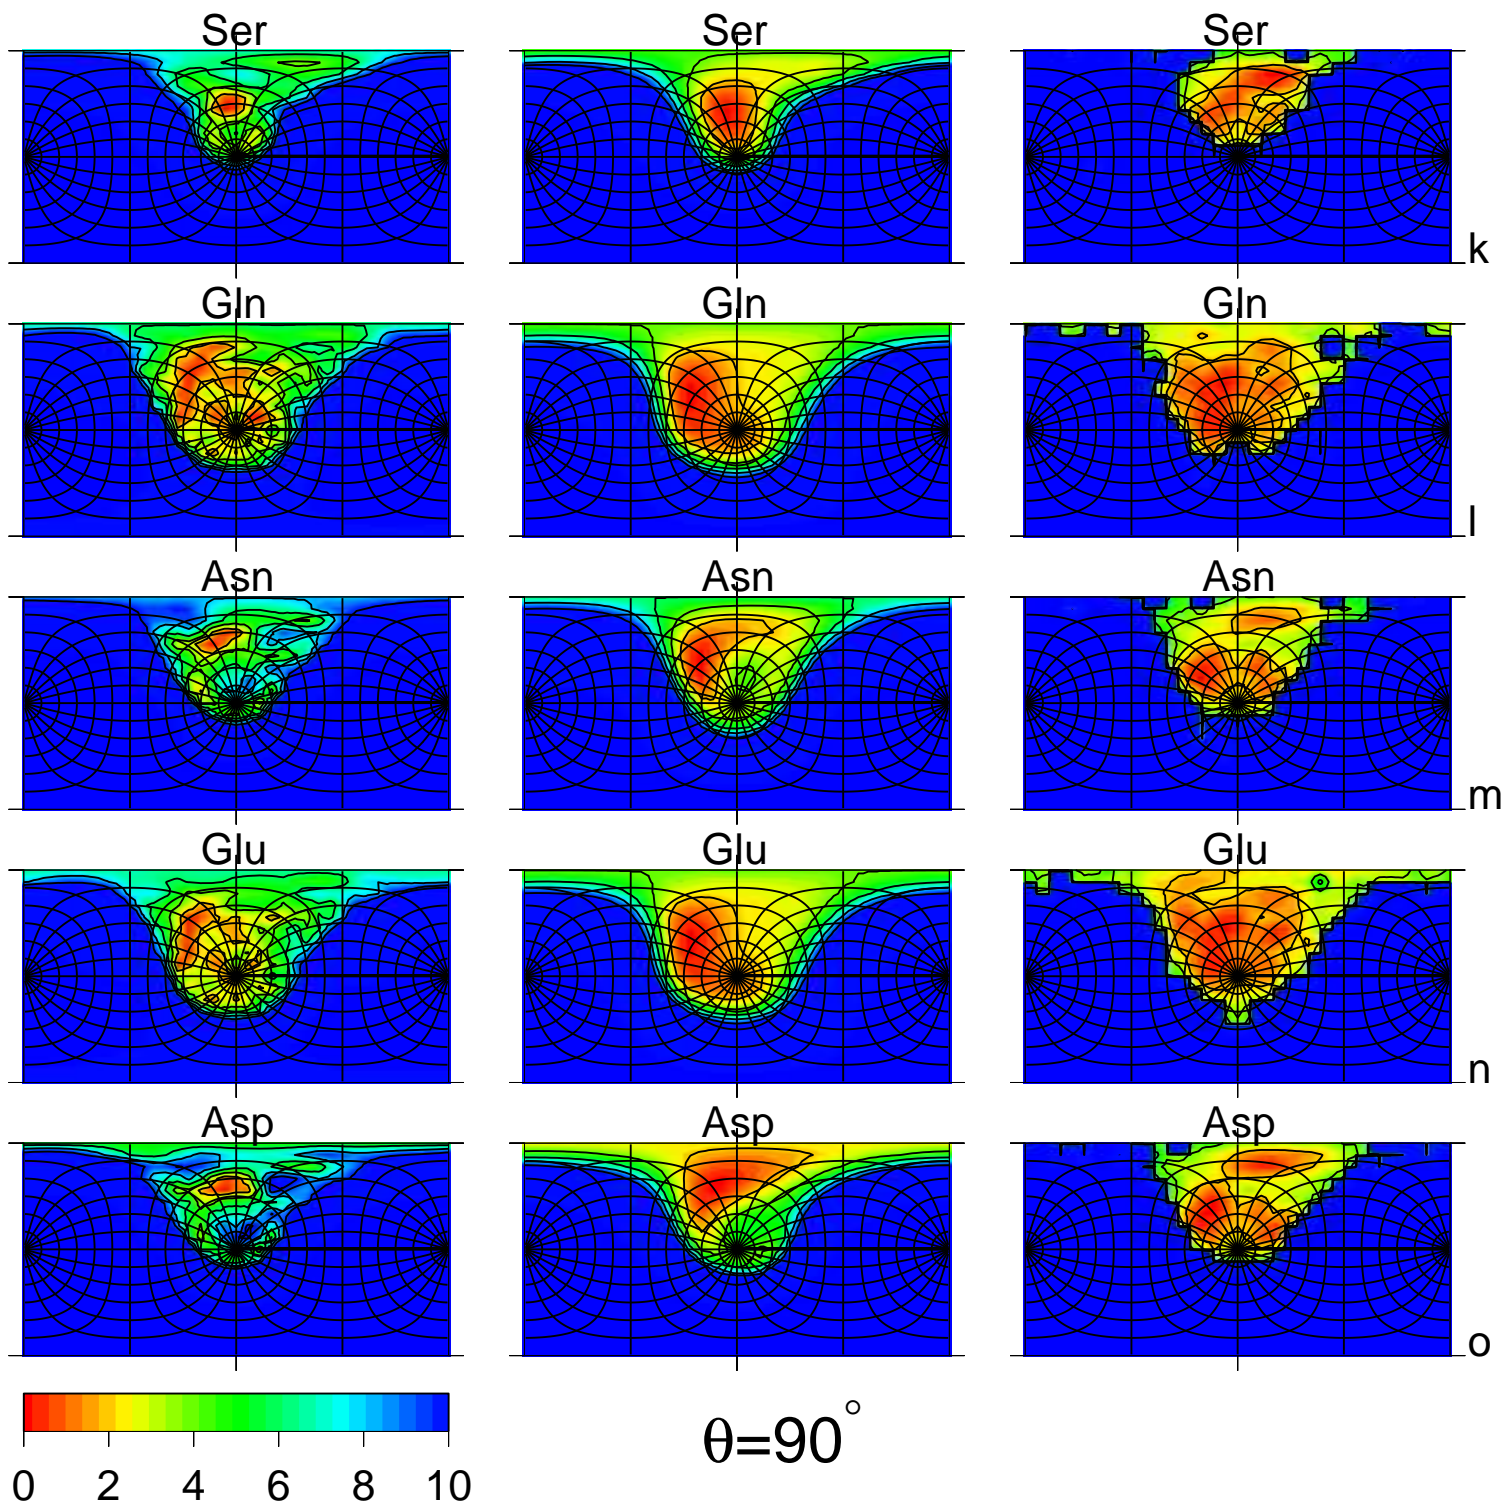

Figure S1 (continued)

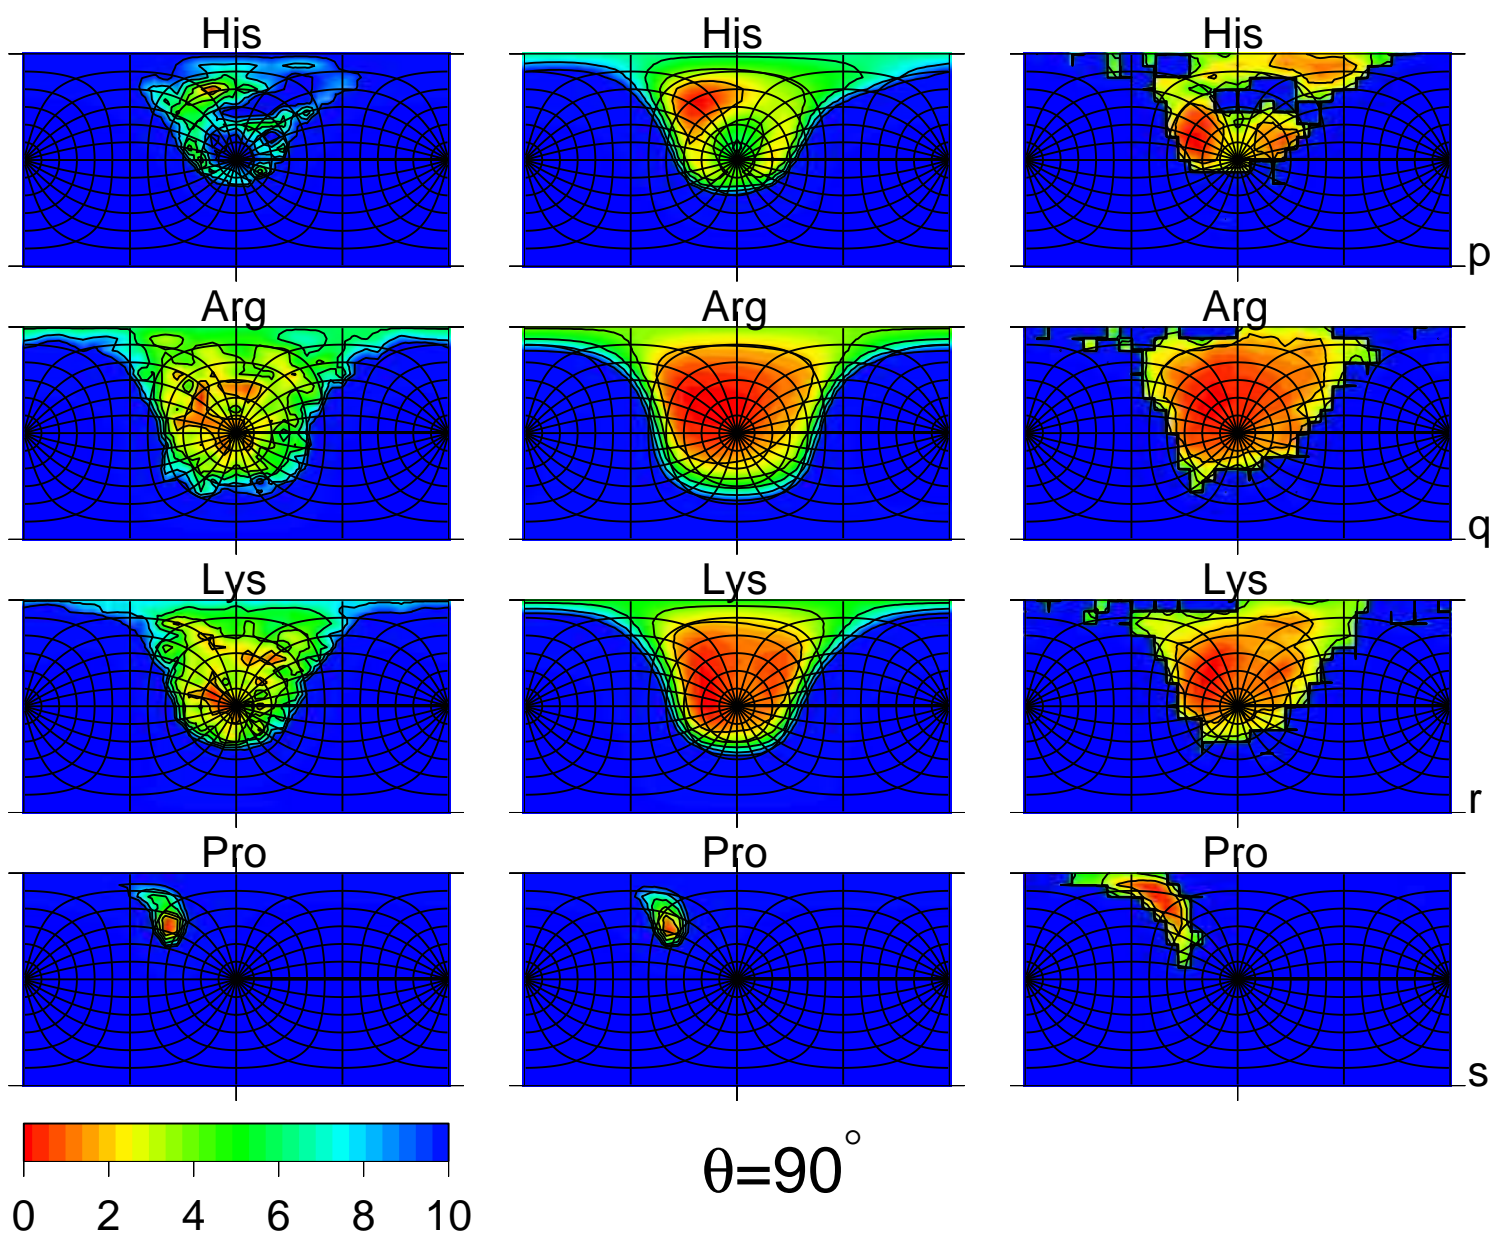

Figure S1 (continued)

Supplement: NIHMS144677-supplement-Supp_Fig_s1.pdf [file NIHMS144677-supplement-Supp_Fig_s1.pdf]

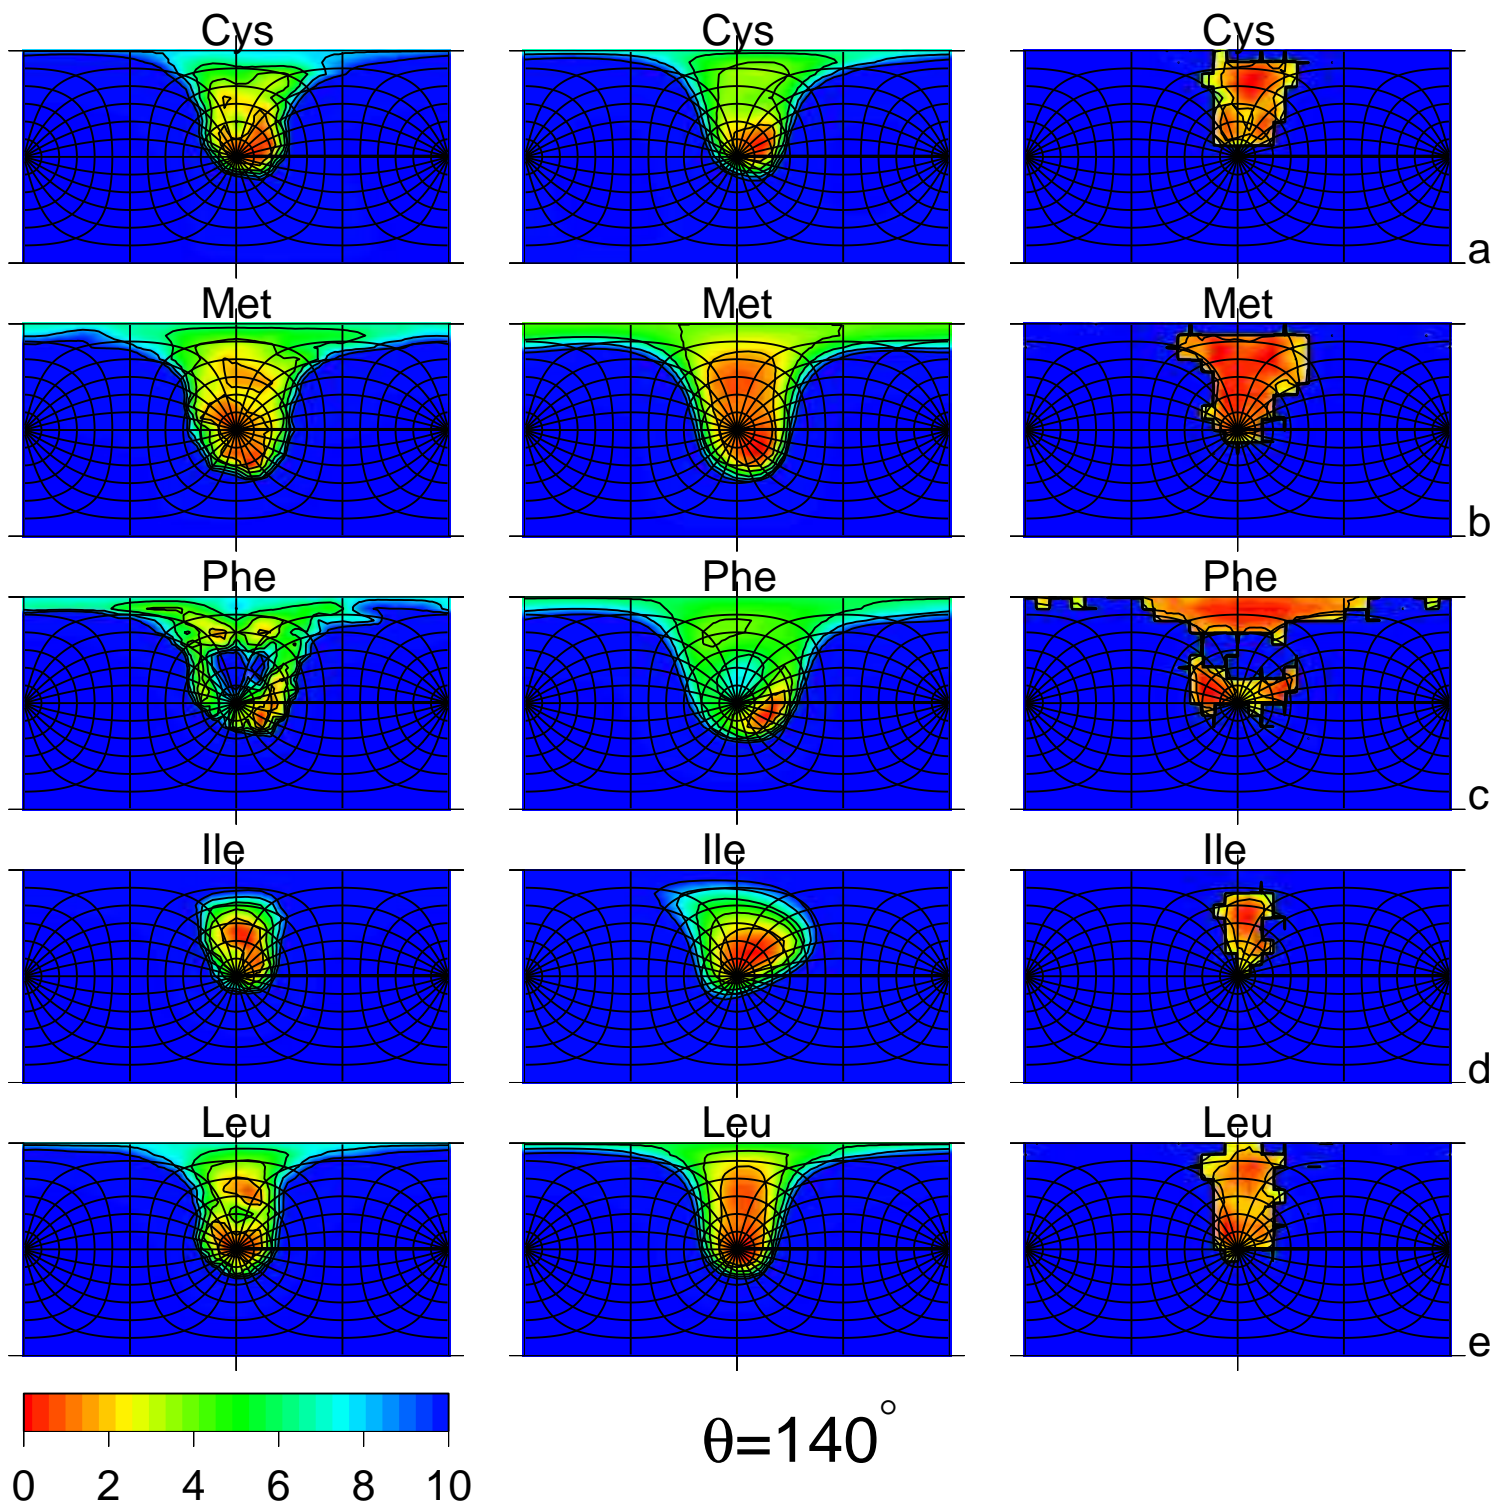

Figure S2

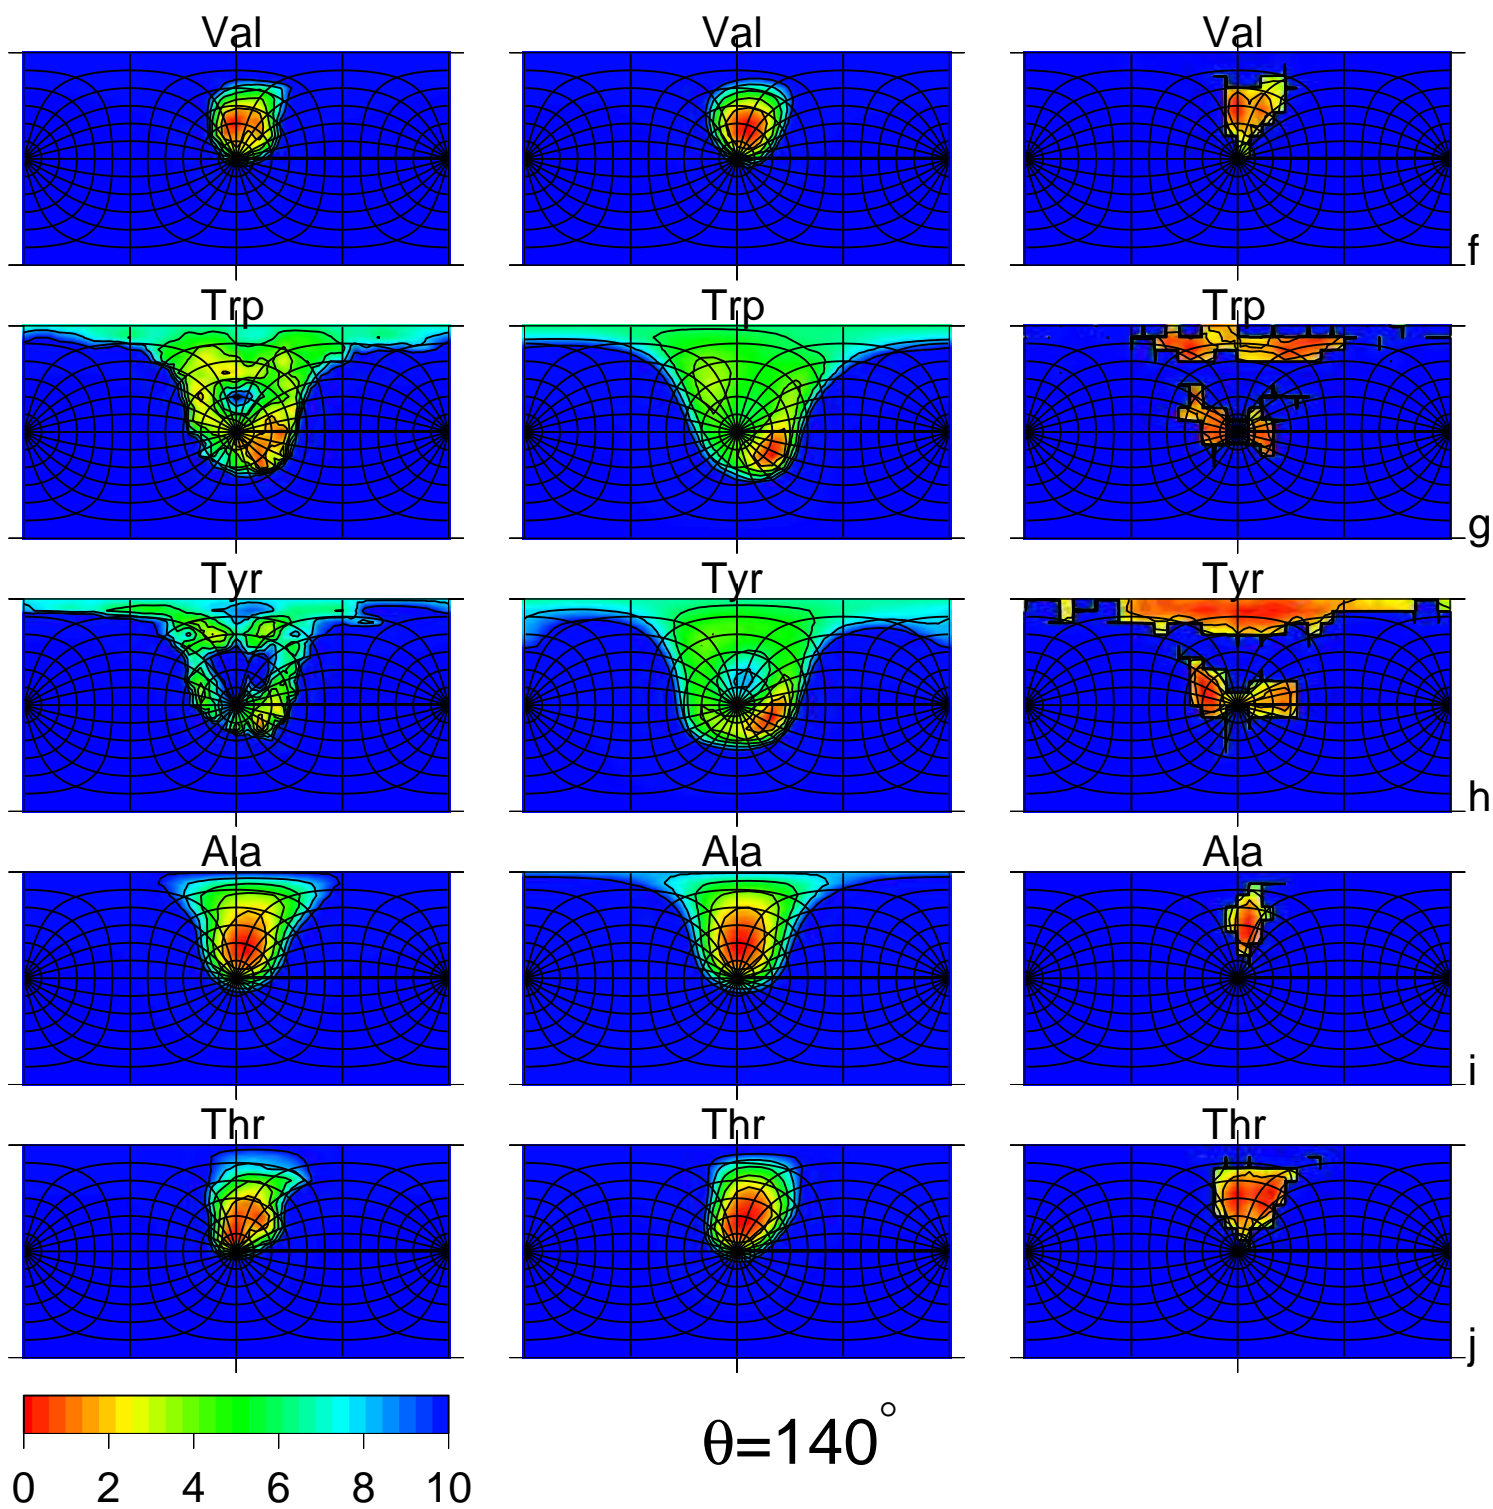

Figure S2 (continued)

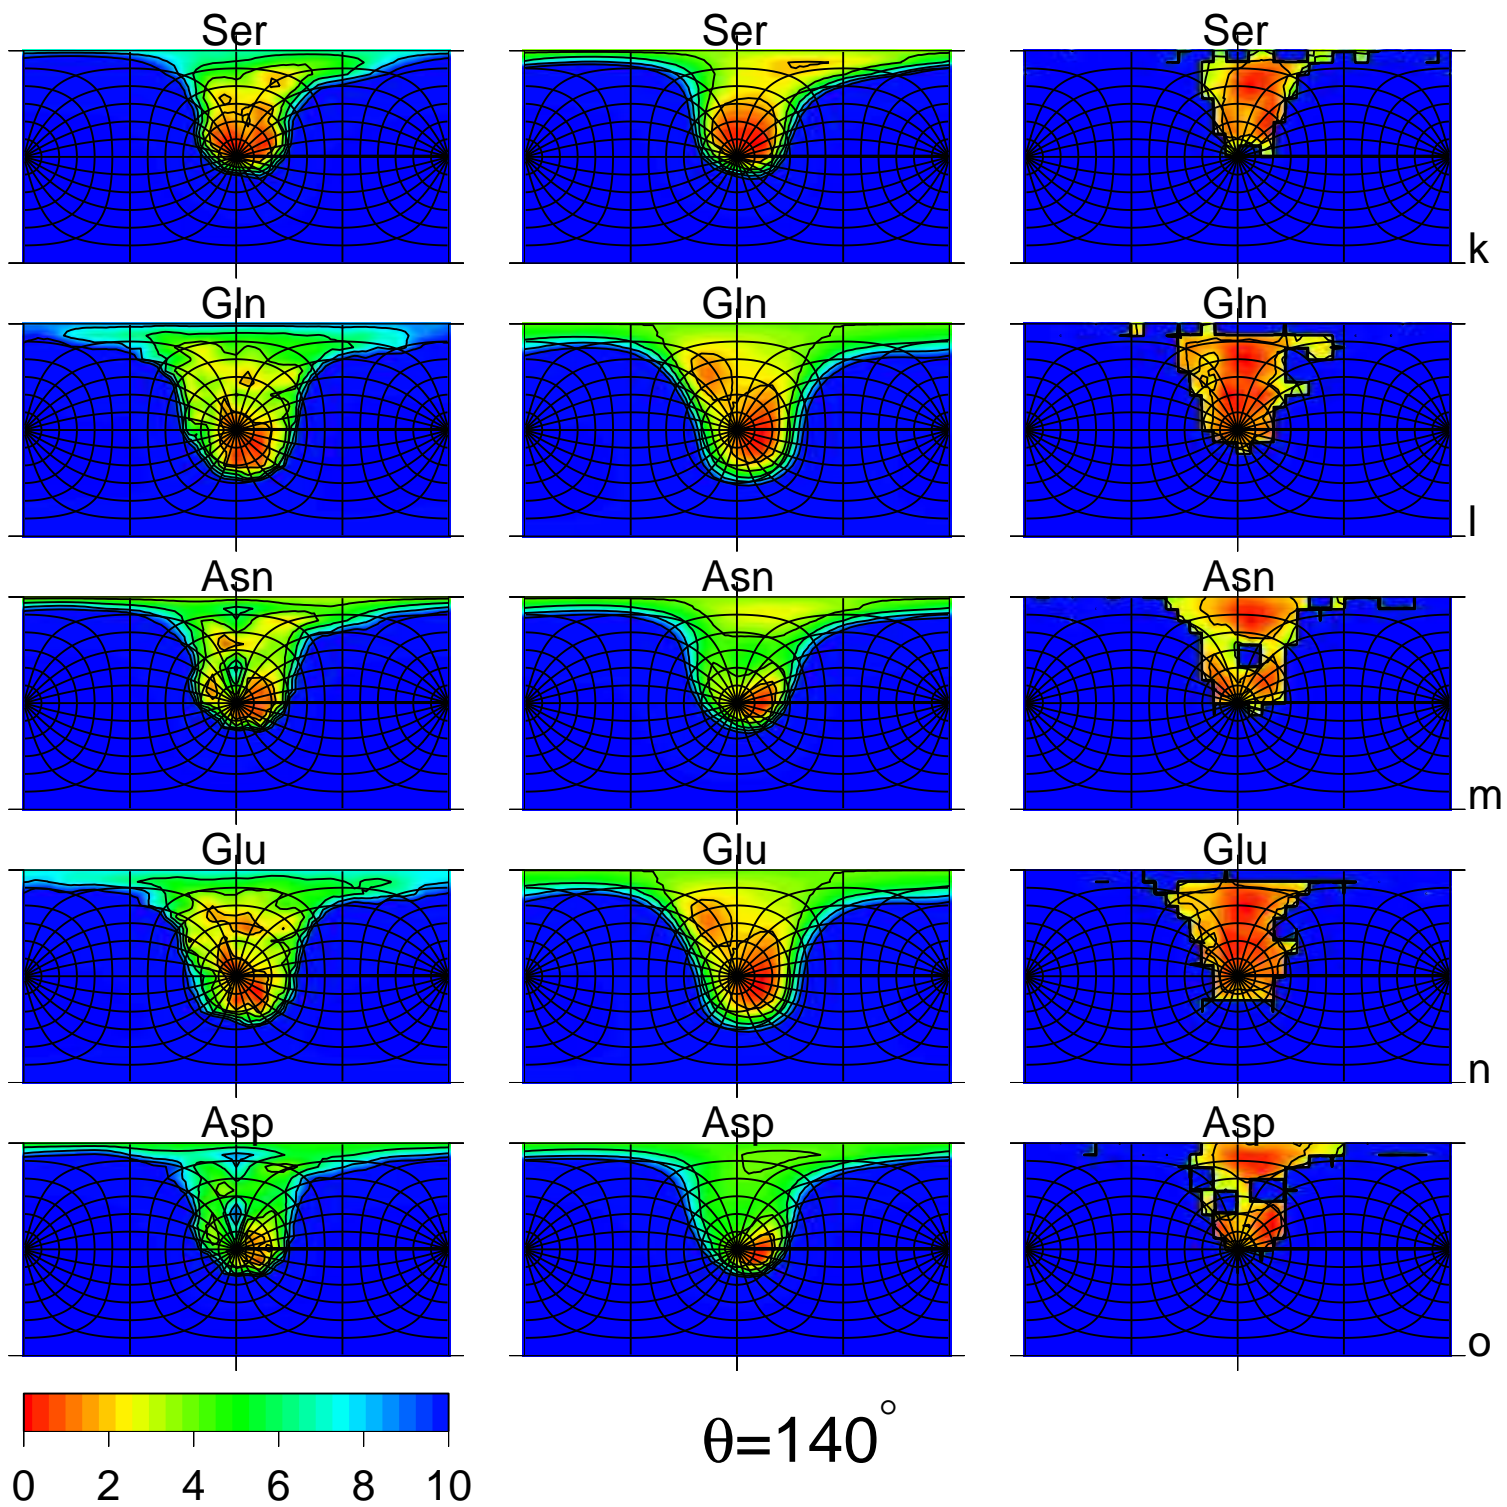

Figure S2 (continued)

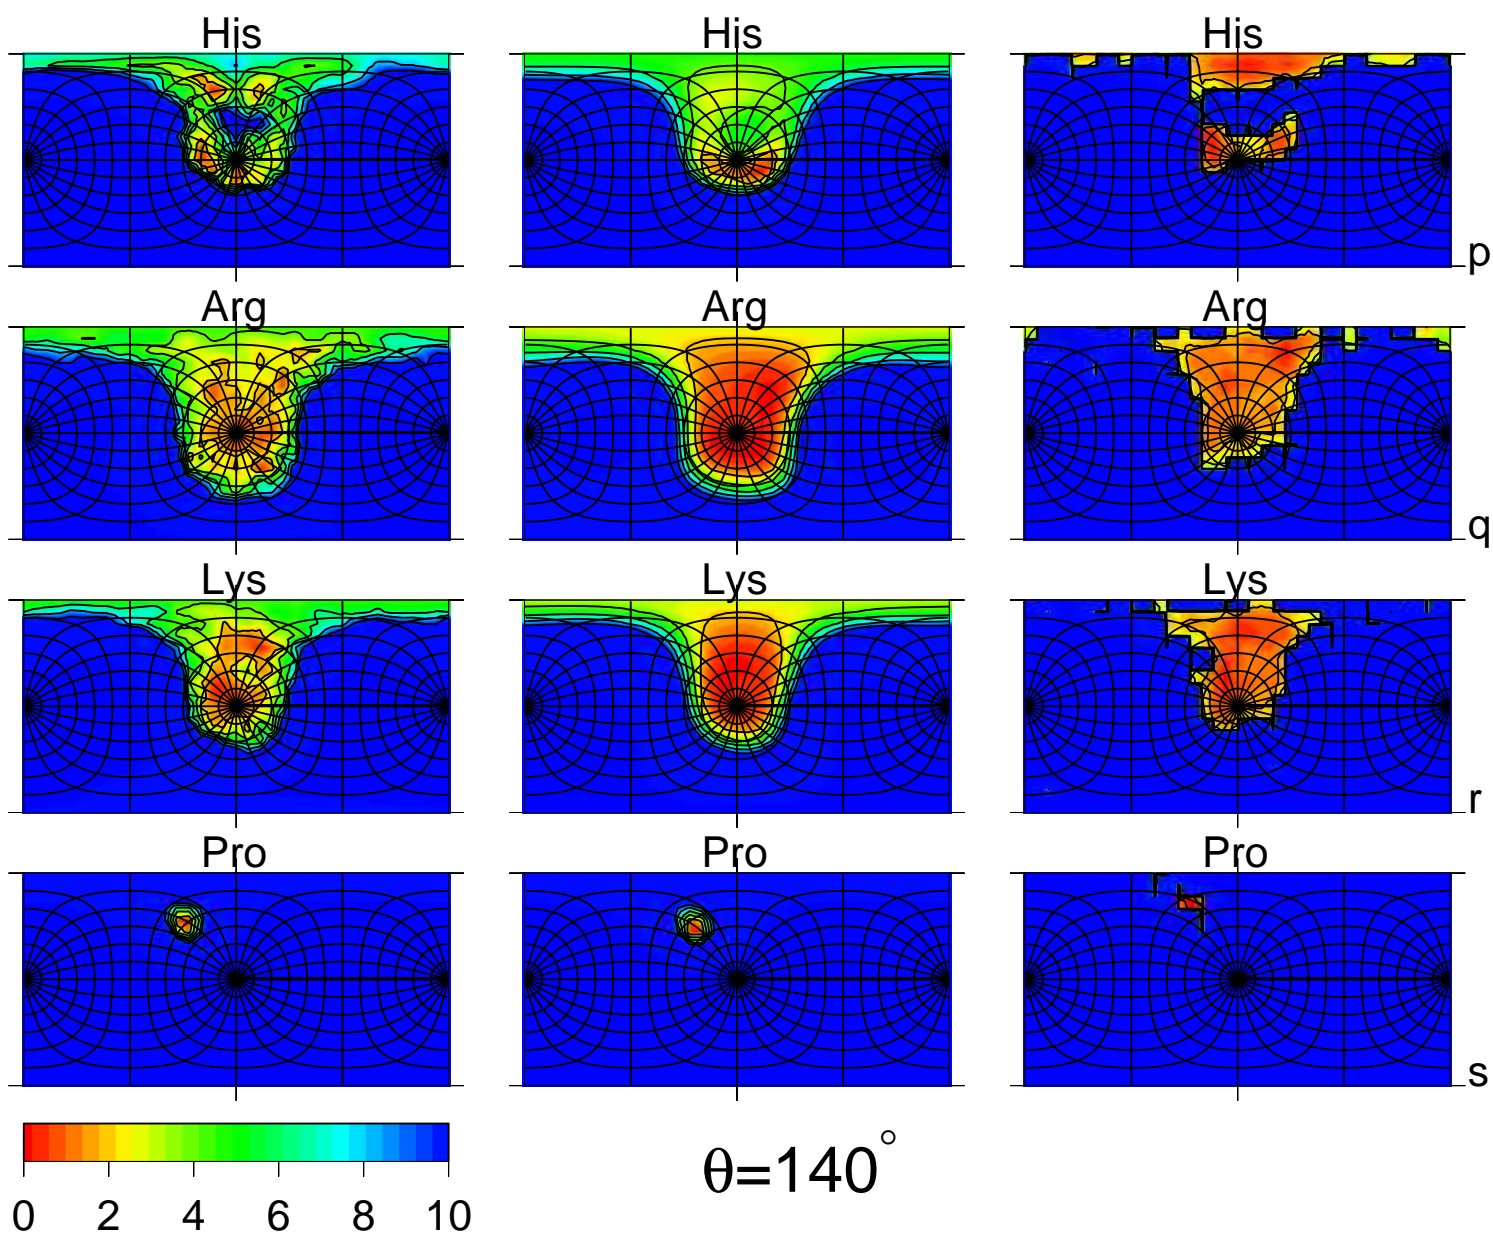

Figure S2 (continued)

Supplement: NIHMS144677-supplement-Supp_Fig_s2.pdf [file NIHMS144677-supplement-Supp_Fig_s2.pdf]

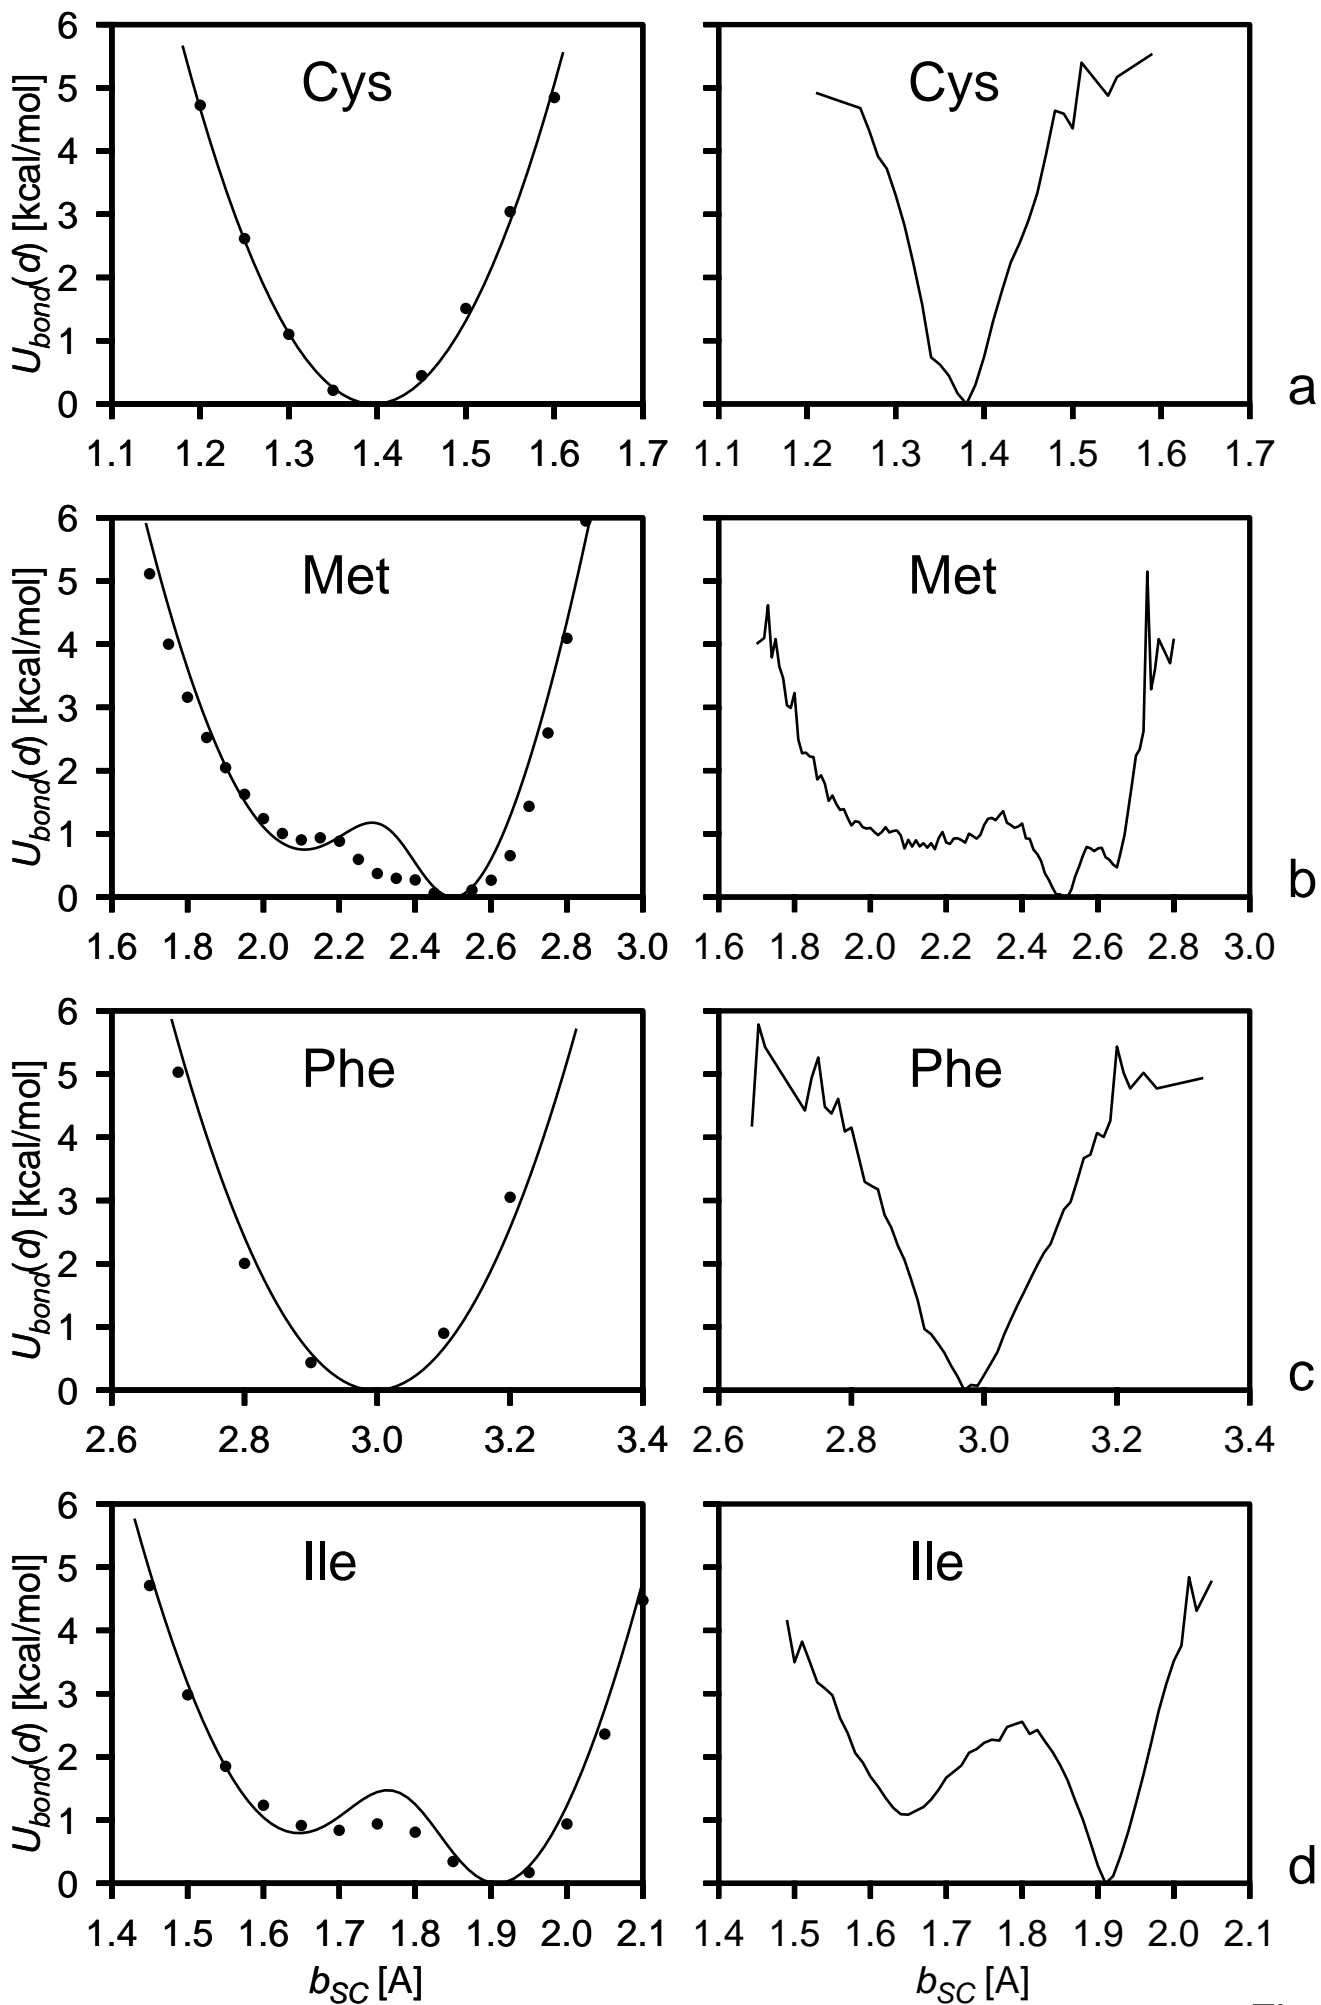

Figure S3

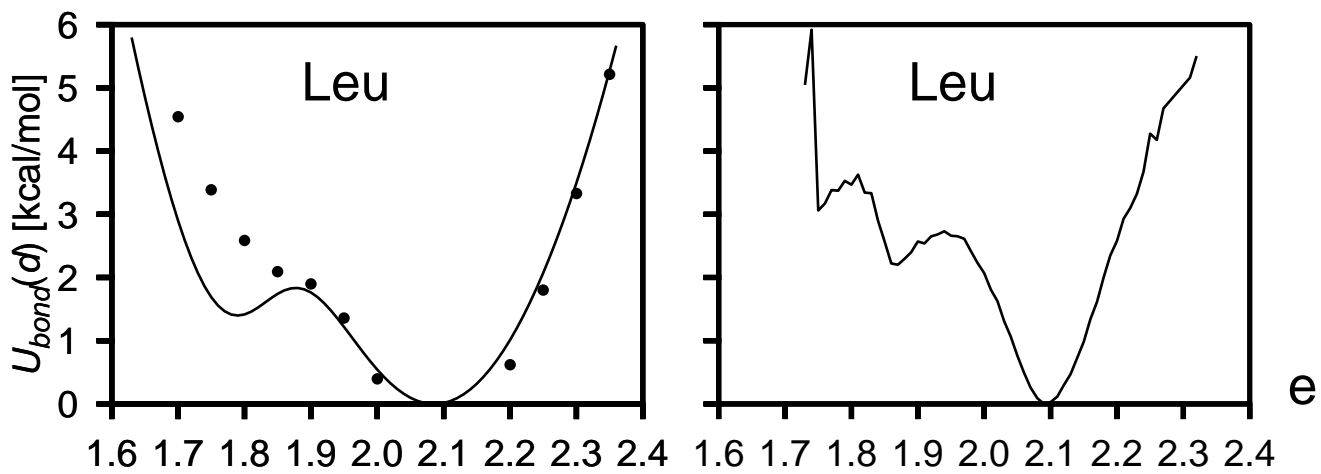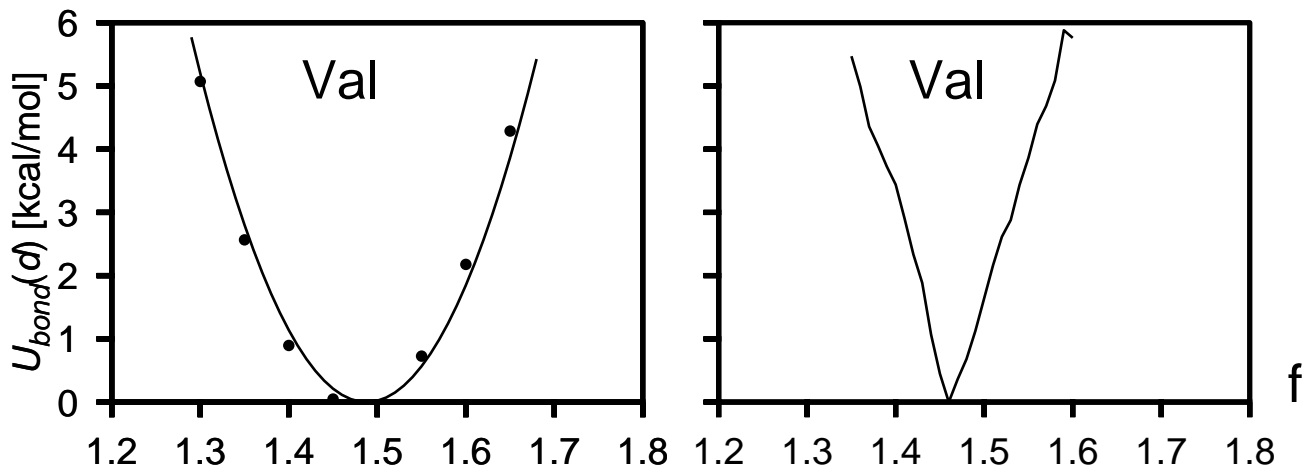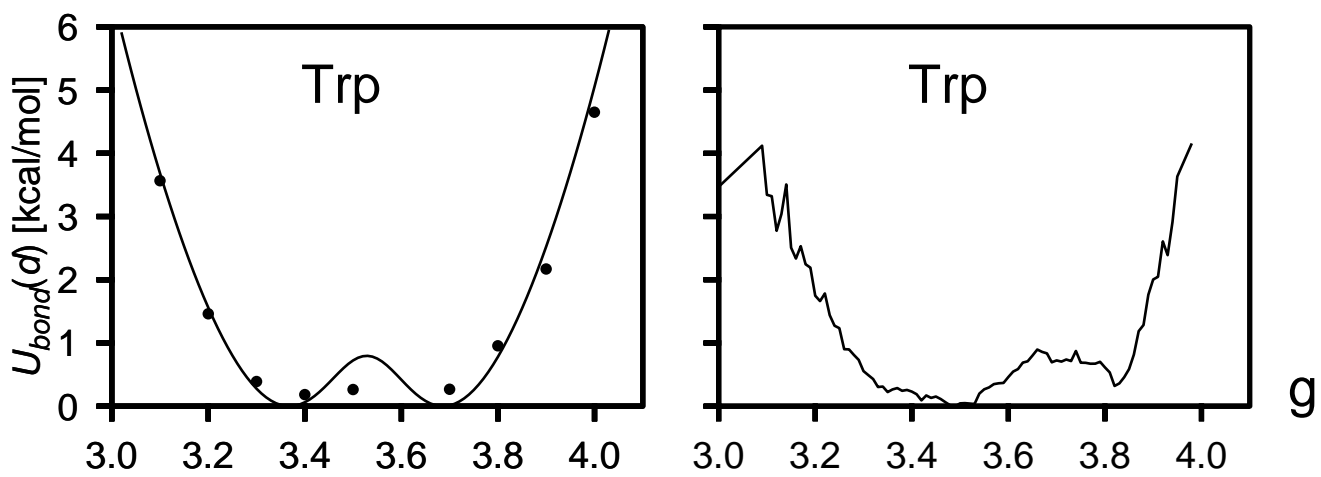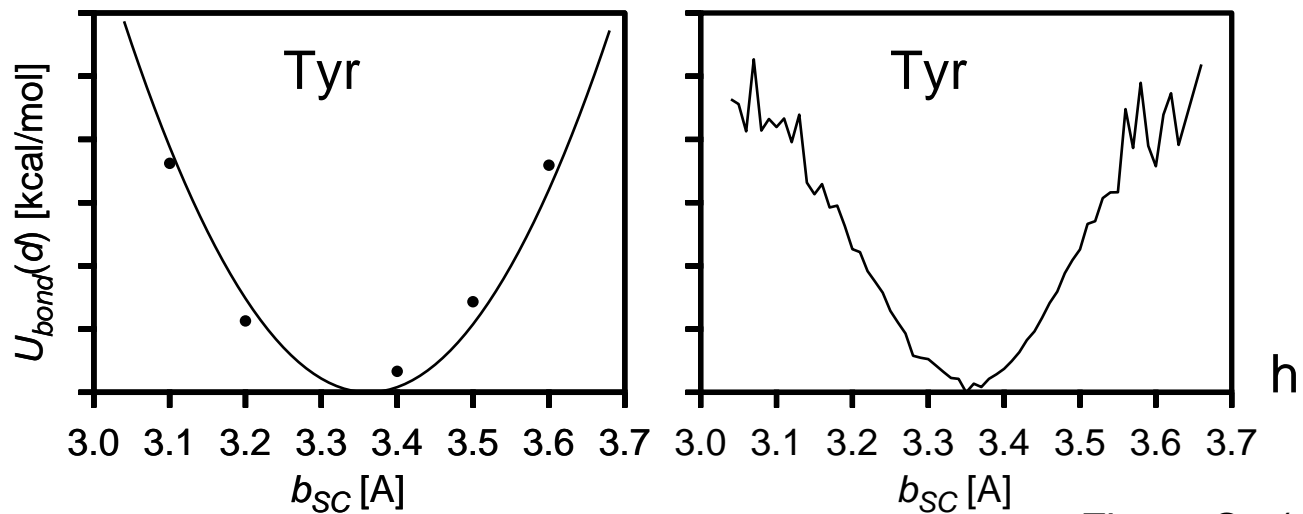

Figure S3 (continued)

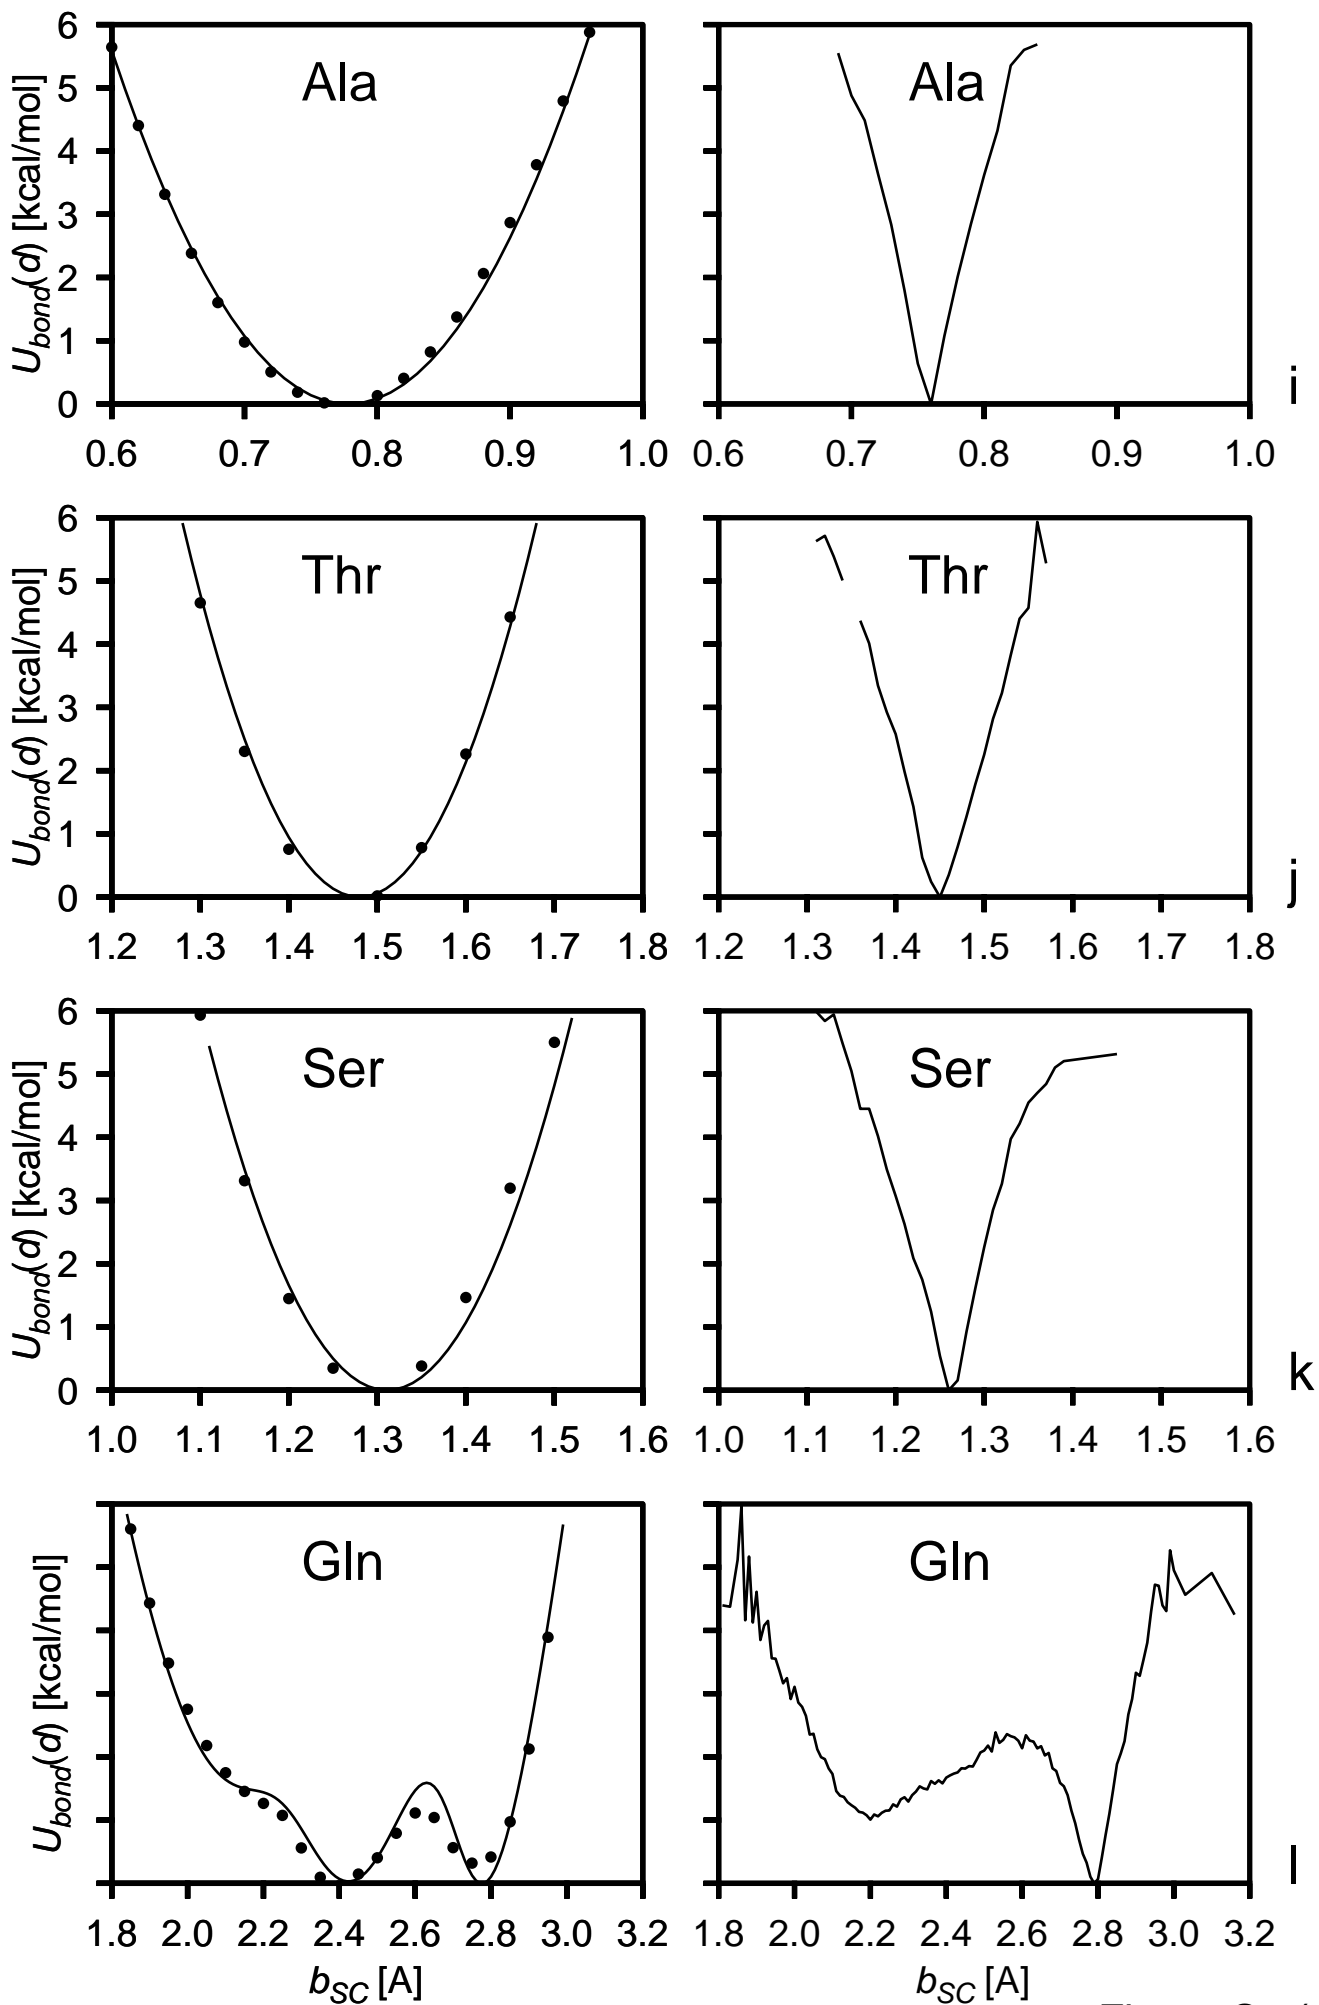

Figure S3 (continued)

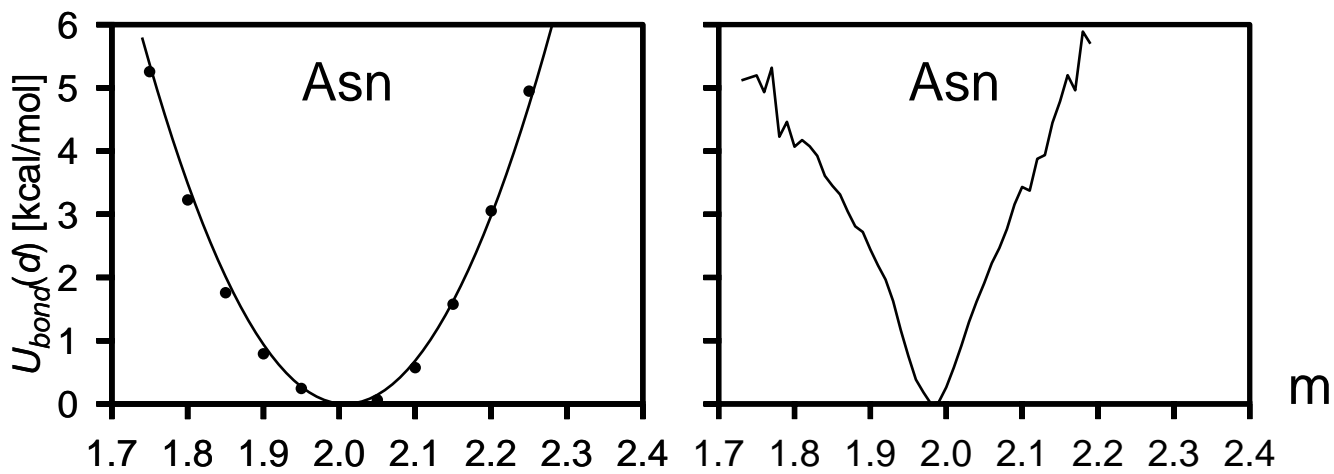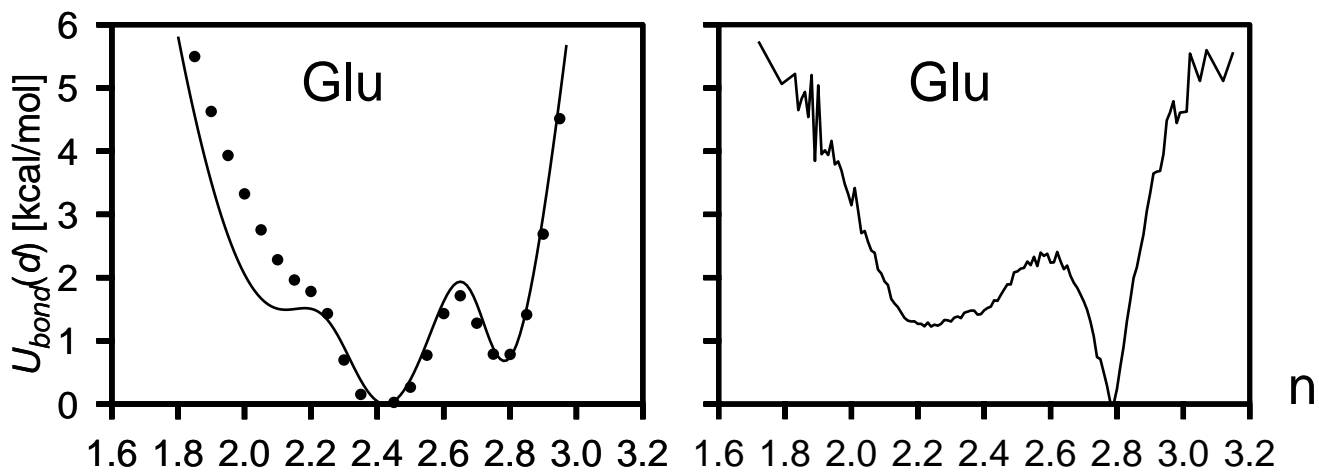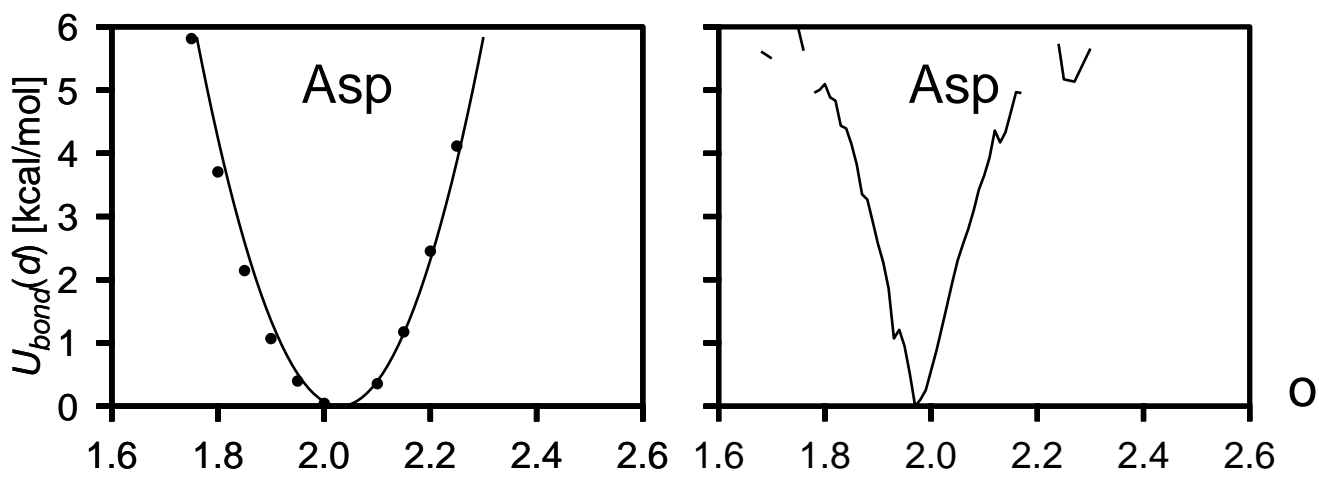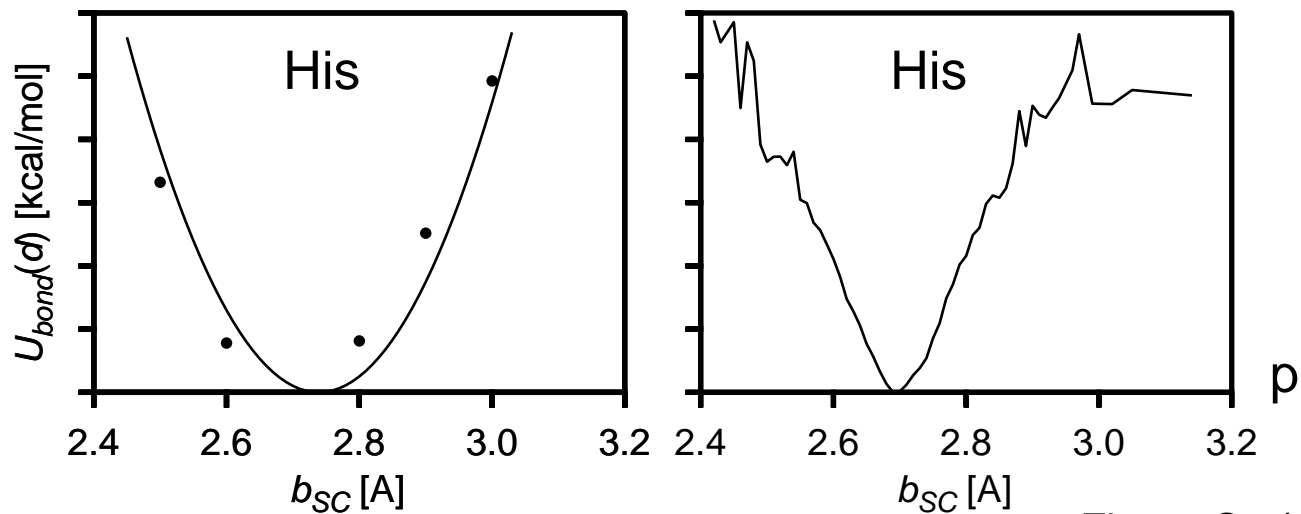

Figure S3 (continued)

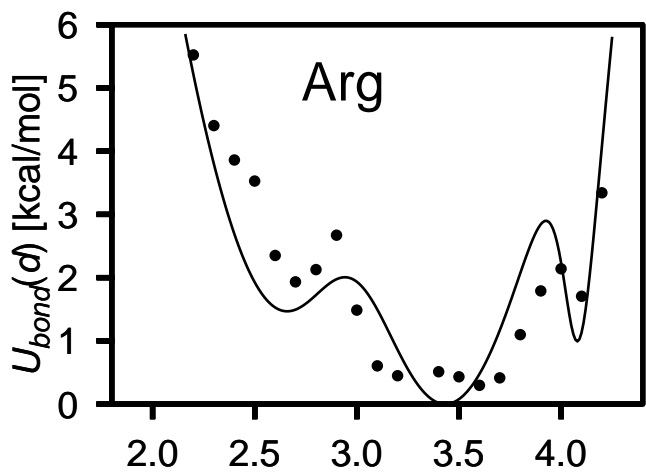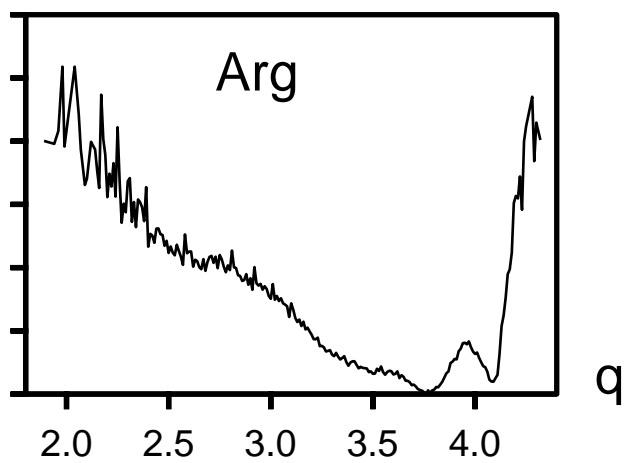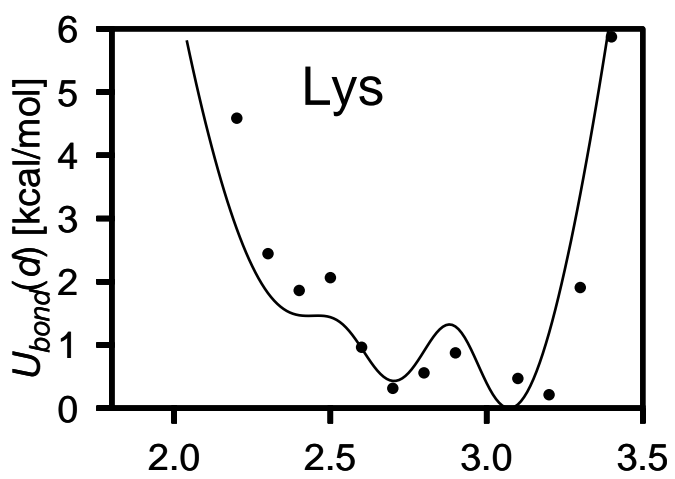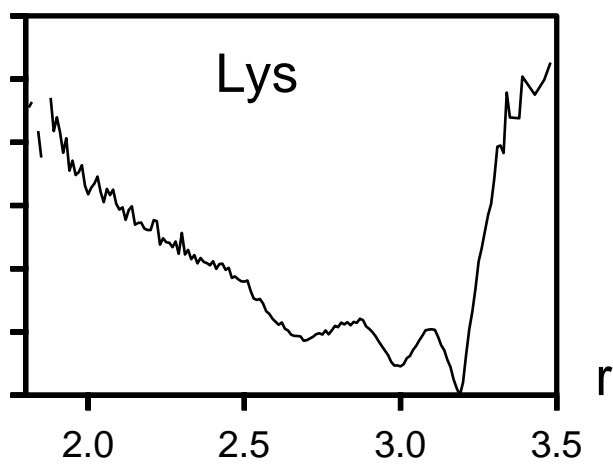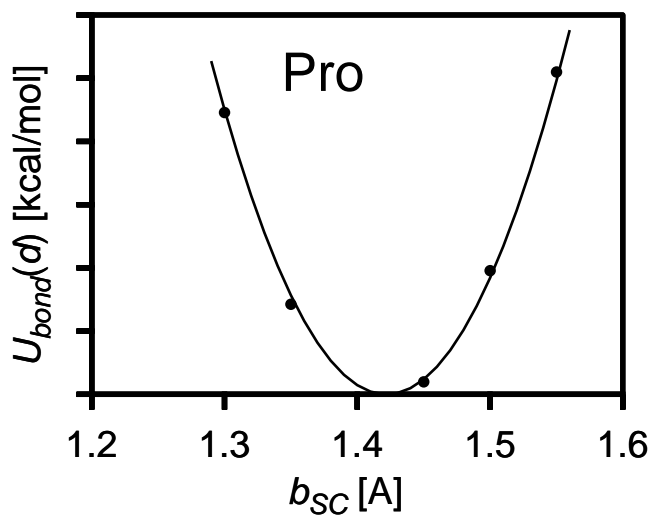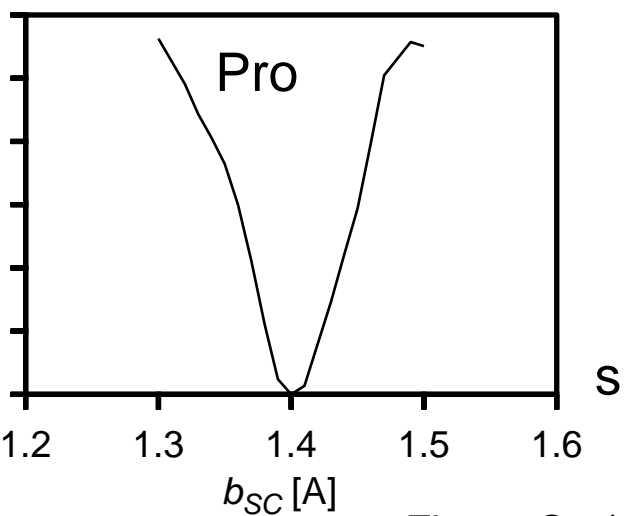

Figure S3 (continued)

Supplement: NIHMS144677-supplement-Supp_Fig_s3.pdf [file NIHMS144677-supplement-Supp_Fig_s3.pdf]
